# Supplementary material for: Protein engineering expands the effector recognition profile of a rice NLR immune receptor
Source: eLife. 2019 Sep 19;8:e47713. doi: 10.7554/eLife.47713 (PMC6768660; doi:10.7554/eLife.47713)
Supplement: Figure 1—figure supplement 1—source data 1. [file elife-47713-fig1-figsupp1-data1.xlsx]

## Sheet: Failed mutants dot NEW
treatment	Score	Replicate
P-EV	0	1
P-EV	0	1
P-EV	0	1
P-EV	0	1
P-EV	0	1
P-D	4	1
P-D	5	1
P-D	5	1
P-D	4	1
P-D	4	1
P-D	4	1
P-D	4	1
P-D	6	1
P-D	5	1
P-D	4	1
P-D	5	1
P-D	5	1
P-D	5	1
P-D	5	1
P-D	5	1
P-D	3	1
P-D	5	1
P-D	4	1
P-D	5	1
P-D	5	1
P-D	5	1
P-D	6	1
P-D	5	1
P-D	5	1
P-D	4	1
P-D	6	1
P-D	4	1
P-D	6	1
P-D	4	1
P-D	4	1
P-D	5	1
P-D	6	1
P-D	6	1
P-D	4	1
P-D	6	1
P-D	4	1
P-D	4	1
P-D	3	1
P-D	6	1
P-D	5	1
P-E	0	1
P-E	0	1
P-E	0	1
P-E	0	1
P-E	0	1
P-A	0	1
P-A	0	1
P-A	0	1
P-A	0	1
P-A	0	1
P-C	0	1
P-C	0	1
P-C	0	1
P-C	0	1
P-C	0	1
P-EV	0	2
P-EV	0	2
P-EV	0	2
P-EV	0	2
P-EV	0	2
P-EV	0	2
P-D	5	2
P-D	4	2
P-D	4	2
P-D	4	2
P-D	4	2
P-D	5	2
P-D	4	2
P-D	5	2
P-D	5	2
P-D	5	2
P-D	5	2
P-D	5	2
P-D	5	2
P-D	5	2
P-D	4	2
P-D	5	2
P-D	5	2
P-D	5	2
P-D	5	2
P-D	6	2
P-D	4	2
P-D	5	2
P-D	6	2
P-D	5	2
P-D	5	2
P-D	5	2
P-D	5	2
P-D	5	2
P-D	5	2
P-D	6	2
P-D	5	2
P-D	5	2
P-D	5	2
P-D	5	2
P-D	5	2
P-D	5	2
P-D	5	2
P-D	5	2
P-D	6	2
P-D	6	2
P-D	5	2
P-D	5	2
P-D	6	2
P-D	6	2
P-D	5	2
P-D	6	2
P-D	5	2
P-D	6	2
P-D	5	2
P-D	5	2
P-D	5	2
P-D	6	2
P-D	5	2
P-D	6	2
P-D	6	2
P-D	6	2
P-D	5	2
P-D	5	2
P-D	5	2
P-D	6	2
P-D	5	2
P-D	5	2
P-D	5	2
P-D	5	2
P-D	4	2
P-D	6	2
P-D	5	2
P-D	4	2
P-D	5	2
P-D	6	2
P-D	5	2
P-D	4	2
P-E	0	2
P-E	0	2
P-E	0	2
P-E	0	2
P-E	0	2
P-E	0	2
P-A	0	2
P-A	1	2
P-A	0	2
P-A	0	2
P-A	0	2
P-A	0	2
P-A	0	2
P-A	0	2
P-A	0	2
P-A	0	2
P-A	0	2
P-A	0	2
P-A	0	2
P-A	0	2
P-A	0	2
P-A	0	2
P-A	0	2
P-A	0	2
P-A	0	2
P-A	0	2
P-A	0	2
P-A	1	2
P-A	0	2
P-A	0	2
P-A	0	2
P-A	0	2
P-A	0	2
P-A	0	2
P-A	0	2
P-A	0	2
P-A	0	2
P-A	0	2
P-A	0	2
P-A	0	2
P-A	0	2
P-A	0	2
P-C	0	2
P-C	0	2
P-C	0	2
P-C	0	2
P-C	0	2
P-C	0	2
P-EV	0	3
P-EV	0	3
P-EV	0	3
P-EV	0	3
P-EV	0	3
P-EV	0	3
P-D	4	3
P-D	2	3
P-D	6	3
P-D	4	3
P-D	5	3
P-D	4	3
P-D	3	3
P-D	3	3
P-D	4	3
P-D	3	3
P-D	4	3
P-D	4	3
P-D	4	3
P-D	4	3
P-D	4	3
P-D	4	3
P-D	3	3
P-D	3	3
P-D	5	3
P-D	4	3
P-D	5	3
P-D	3	3
P-D	3	3
P-D	4	3
P-D	4	3
P-D	4	3
P-D	4	3
P-D	4	3
P-D	2	3
P-D	3	3
P-D	3	3
P-D	3	3
P-D	4	3
P-D	5	3
P-D	4	3
P-D	4	3
P-D	4	3
P-D	4	3
P-D	4	3
P-D	6	3
P-D	4	3
P-D	6	3
P-D	3	3
P-D	6	3
P-D	3	3
P-D	3	3
P-D	3	3
P-D	3	3
P-D	3	3
P-D	3	3
P-D	3	3
P-D	4	3
P-D	3	3
P-D	3	3
P-D	4	3
P-D	3	3
P-D	4	3
P-D	4	3
P-D	3	3
P-D	4	3
P-D	4	3
P-D	5	3
P-D	3	3
P-D	4	3
P-D	4	3
P-D	4	3
P-D	4	3
P-E	0	3
P-E	0	3
P-E	0	3
P-E	0	3
P-E	0	3
P-E	0	3
P-A	0	3
P-A	0	3
P-A	0	3
P-A	0	3
P-A	0	3
P-A	0	3
P-C	0	3
P-C	0	3
P-C	0	3
P-C	0	3
P-C	0	3
P-C	0	3
NK EV	0	1
NK EV	0	1
NK EV	0	1
NK EV	0	1
NK EV	0	1
NK EV	0	1
NK EV	0	1
NK EV	0	1
NK EV	0	1
NK EV	0	1
NK D	5	1
NK D	5	1
NK D	5	1
NK D	5	1
NK D	6	1
NK D	5	1
NK D	5	1
NK D	6	1
NK D	5	1
NK D	5	1
NK E	2	1
NK E	3	1
NK E	3	1
NK E	2	1
NK E	3	1
NK E	3	1
NK E	2	1
NK E	2	1
NK E	4	1
NK E	2	1
NK A	2	1
NK A	1	1
NK A	2	1
NK A	0	1
NK A	1	1
NK A	2	1
NK A	1	1
NK A	2	1
NK A	2	1
NK A	1	1
NK C	0	1
NK C	0	1
NK C	0	1
NK C	0	1
NK C	0	1
NK C	0	1
NK C	2	1
NK C	0	1
NK C	0	1
NK C	0	1
NK EV	0	2
NK EV	0	2
NK EV	0	2
NK EV	0	2
NK EV	0	2
NK EV	0	2
NK D	5	2
NK D	4	2
NK D	6	2
NK D	5	2
NK D	3	2
NK D	6	2
NK E	4	2
NK E	1	2
NK E	3	2
NK E	5	2
NK E	2	2
NK E	4	2
NK A	3	2
NK A	0	2
NK A	2	2
NK A	1	2
NK A	2	2
NK A	2	2
NK C	0	2
NK C	0	2
NK C	0	2
NK C	0	2
NK C	0	2
NK C	0	2
NK EV	0	3
NK EV	0	3
NK EV	0	3
NK EV	0	3
NK EV	0	3
NK EV	0	3
NK D	4	3
NK D	3	3
NK D	4	3
NK D	5	3
NK D	3	3
NK D	5	3
NK E	3	3
NK E	0	3
NK E	3	3
NK E	2	3
NK E	0	3
NK E	3	3
NK A	2	3
NK A	0	3
NK A	3	3
NK A	1	3
NK A	0	3
NK A	2	3
NK C	0	3
NK C	0	3
NK C	0	3
NK C	0	3
NK C	0	3
NK C	0	3
E230V EV	0	1
E230V EV	0	1
E230V EV	0	1
E230V EV	0	1
E230V EV	0	1
E230V EV	0	1
E230V D	0	1
E230V D	0	1
E230V D	0	1
E230V D	0	1
E230V D	0	1
E230V D	0	1
E230V E	0	1
E230V E	0	1
E230V E	0	1
E230V E	0	1
E230V E	0	1
E230V E	0	1
E230V A	0	1
E230V A	0	1
E230V A	0	1
E230V A	0	1
E230V A	0	1
E230V A	0	1
E230V C	0	1
E230V C	0	1
E230V C	0	1
E230V C	0	1
E230V C	0	1
E230V C	0	1
E230V EV	0	2
E230V EV	0	2
E230V EV	0	2
E230V EV	0	2
E230V EV	0	2
E230V EV	0	2
E230V D	0	2
E230V D	0	2
E230V D	0	2
E230V D	0	2
E230V D	0	2
E230V D	0	2
E230V E	0	2
E230V E	0	2
E230V E	0	2
E230V E	0	2
E230V E	0	2
E230V E	0	2
E230V A	0	2
E230V A	0	2
E230V A	0	2
E230V A	0	2
E230V A	0	2
E230V A	0	2
E230V C	0	2
E230V C	0	2
E230V C	0	2
E230V C	0	2
E230V C	0	2
E230V C	0	2
E230V EV	0	3
E230V EV	0	3
E230V EV	0	3
E230V EV	0	3
E230V EV	0	3
E230V EV	0	3
E230V D	0	3
E230V D	0	3
E230V D	0	3
E230V D	0	3
E230V D	0	3
E230V D	0	3
E230V E	0	3
E230V E	0	3
E230V E	0	3
E230V E	0	3
E230V E	0	3
E230V E	0	3
E230V A	0	3
E230V A	0	3
E230V A	0	3
E230V A	0	3
E230V A	0	3
E230V A	0	3
E230V C	0	3
E230V C	0	3
E230V C	0	3
E230V C	0	3
E230V C	0	3
E230V C	0	3
K228Q EV	0	1
K228Q EV	0	1
K228Q EV	0	1
K228Q EV	0	1
K228Q EV	0	1
K228Q EV	0	1
K228Q D	5	1
K228Q D	5	1
K228Q D	5	1
K228Q D	6	1
K228Q D	5	1
K228Q D	6	1
K228Q E	0	1
K228Q E	0	1
K228Q E	0	1
K228Q E	0	1
K228Q E	0	1
K228Q E	2	1
K228Q A	0	1
K228Q A	0	1
K228Q A	0	1
K228Q A	0	1
K228Q A	0	1
K228Q A	0	1
K228Q C	0	1
K228Q C	0	1
K228Q C	0	1
K228Q C	0	1
K228Q C	0	1
K228Q C	0	1
K228Q EV	0	2
K228Q EV	0	2
K228Q EV	0	2
K228Q EV	0	2
K228Q EV	0	2
K228Q EV	0	2
K228Q D	5	2
K228Q D	4	2
K228Q D	4	2
K228Q D	3	2
K228Q D	6	2
K228Q D	5	2
K228Q E	0	2
K228Q E	0	2
K228Q E	0	2
K228Q E	0	2
K228Q E	0	2
K228Q E	0	2
K228Q A	0	2
K228Q A	0	2
K228Q A	0	2
K228Q A	2	2
K228Q A	0	2
K228Q A	0	2
K228Q C	0	2
K228Q C	0	2
K228Q C	0	2
K228Q C	0	2
K228Q C	0	2
K228Q C	0	2
K228Q EV	0	3
K228Q EV	0	3
K228Q EV	0	3
K228Q EV	0	3
K228Q EV	0	3
K228Q EV	0	3
K228Q D	6	3
K228Q D	5	3
K228Q D	6	3
K228Q D	4	3
K228Q D	4	3
K228Q D	5	3
K228Q E	0	3
K228Q E	0	3
K228Q E	0	3
K228Q E	0	3
K228Q E	0	3
K228Q E	0	3
K228Q A	0	3
K228Q A	0	3
K228Q A	0	3
K228Q A	0	3
K228Q A	0	3
K228Q A	0	3
K228Q C	0	3
K228Q C	0	3
K228Q C	0	3
K228Q C	0	3
K228Q C	0	3
K228Q C	0	3
V222A EV	0	2
V222A EV	0	2
V222A EV	0	2
V222A EV	0	2
V222A EV	0	2
V222A D	1	2
V222A D	0	2
V222A D	1	2
V222A D	3	2
V222A D	1	2
V222A E	0	2
V222A E	0	2
V222A E	1	2
V222A E	0	2
V222A E	0	2
V222A A	0	2
V222A A	0	2
V222A A	0	2
V222A A	0	2
V222A A	0	2
V222A C	0	2
V222A C	0	2
V222A C	0	2
V222A C	0	2
V222A C	0	2
V222A EV	0	3
V222A EV	0	3
V222A EV	0	3
V222A EV	0	3
V222A EV	0	3
V222A EV	0	3
V222A D	2	3
V222A D	0	3
V222A D	1	3
V222A D	0	3
V222A D	0	3
V222A D	0	3
V222A E	0	3
V222A E	0	3
V222A E	0	3
V222A E	0	3
V222A E	0	3
V222A E	0	3
V222A A	0	3
V222A A	0	3
V222A A	0	3
V222A A	0	3
V222A A	0	3
V222A A	0	3
V222A C	0	3
V222A C	0	3
V222A C	0	3
V222A C	0	3
V222A C	0	3
V222A C	0	3
V222A EV	0	1
V222A EV	0	1
V222A EV	0	1
V222A EV	0	1
V222A EV	0	1
V222A EV	0	1
V222A D	0	1
V222A D	1	1
V222A D	0	1
V222A D	0	1
V222A D	1	1
V222A D	0	1
V222A E	0	1
V222A E	0	1
V222A E	0	1
V222A E	0	1
V222A E	0	1
V222A E	0	1
V222A A	0	1
V222A A	0	1
V222A A	0	1
V222A A	0	1
V222A A	0	1
V222A A	0	1
V222A C	0	1
V222A C	0	1
V222A C	0	1
V222A C	0	1
V222A C	0	1
V222A C	0	1
KIE EV	0	2
KIE EV	0	2
KIE EV	0	2
KIE EV	0	2
KIE EV	0	2
KIE EV	0	2
KIE D	0	2
KIE D	0	2
KIE D	0	2
KIE D	0	2
KIE D	0	2
KIE D	0	2
KIE E	0	2
KIE E	0	2
KIE E	0	2
KIE E	0	2
KIE E	0	2
KIE E	0	2
KIE A	0	2
KIE A	0	2
KIE A	0	2
KIE A	0	2
KIE A	0	2
KIE A	0	2
KIE C	0	2
KIE C	0	2
KIE C	0	2
KIE C	0	2
KIE C	0	2
KIE C	0	2
KIE EV	0	3
KIE EV	0	3
KIE EV	0	3
KIE EV	0	3
KIE EV	0	3
KIE EV	0	3
KIE D	0	3
KIE D	0	3
KIE D	0	3
KIE D	0	3
KIE D	0	3
KIE D	0	3
KIE E	0	3
KIE E	0	3
KIE E	0	3
KIE E	0	3
KIE E	0	3
KIE E	0	3
KIE A	0	3
KIE A	0	3
KIE A	0	3
KIE A	0	3
KIE A	0	3
KIE A	0	3
KIE C	0	3
KIE C	0	3
KIE C	0	3
KIE C	0	3
KIE C	0	3
KIE C	0	3
KIE EV	0	1
KIE EV	0	1
KIE EV	0	1
KIE EV	0	1
KIE EV	0	1
KIE EV	0	1
KIE D	0	1
KIE D	0	1
KIE D	0	1
KIE D	0	1
KIE D	0	1
KIE D	0	1
KIE E	0	1
KIE E	0	1
KIE E	0	1
KIE E	0	1
KIE E	0	1
KIE E	0	1
KIE A	0	1
KIE A	0	1
KIE A	0	1
KIE A	0	1
KIE A	0	1
KIE A	0	1
KIE C	0	1
KIE C	0	1
KIE C	0	1
KIE C	0	1
KIE C	0	1
KIE C	0	1
