# Supplementary material for: Protein engineering expands the effector recognition profile of a rice NLR immune receptor
Source: eLife. 2019 Sep 19;8:e47713. doi: 10.7554/eLife.47713 (PMC6768660; doi:10.7554/eLife.47713)
Supplement: Figure 1—figure supplement 2—source data 1. [file elife-47713-fig1-figsupp2-data1.xlsx]

## Sheet: Fig1 NK-M
treatment	Score	Replicate
M-D	5	1
M-D	4	1
M-D	3	1
M-D	5	1
M-D	5	1
M-D	6	1
M-D	5	1
M-D	4	1
M-D	3	1
M-D	5	1
M-D	6	1
M-D	5	1
M-D	4	1
M-D	4	1
M-D	6	1
M-D	5	1
M-D	4	1
M-D	5	1
M-D	4	1
M-D	4	1
M-D	6	1
M-D	3	1
M-D	5	1
M-D	4	1
M-D	6	1
M-D	6	1
M-D	6	1
M-D	5	1
M-D	4	1
M-D	4	2
M-D	5	2
M-D	4	2
M-D	4	2
M-D	4	2
M-D	5	2
M-D	3	2
M-D	3	2
M-D	2	2
M-D	4	2
M-D	5	2
M-D	5	2
M-D	4	2
M-D	5	2
M-D	6	2
M-D	4	2
M-D	3	2
M-D	5	2
M-D	4	2
M-D	5	2
M-D	4	2
M-D	6	2
M-D	5	2
M-D	3	2
M-D	6	2
M-D	6	2
M-D	4	2
M-D	2	2
M-D	3	2
M-D	6	2
M-D	4	3
M-D	4	3
M-D	4	3
M-D	2	3
M-D	5	3
M-D	1	3
M-D	4	3
M-D	4	3
M-D	5	3
M-D	3	3
M-D	6	3
M-D	4	3
M-D	4	3
M-D	1	3
M-D	4	3
M-D	4	3
M-D	4	3
M-D	2	3
M-D	5	3
M-D	2	3
M-D	4	3
M-D	4	3
M-D	5	3
M-D	6	3
M-D	2	3
M-D	3	3
M-D	4	3
M-D	3	3
M-D	4	3
M-D	3	3
M-D	3	3
M-E	3	1
M-E	2	1
M-E	4	1
M-E	4	1
M-E	4	1
M-E	2	1
M-E	3	1
M-E	3	1
M-E	1	1
M-E	0	1
M-E	4	1
M-E	4	1
M-E	0	1
M-E	2	1
M-E	2	1
M-E	0	1
M-E	0	1
M-E	3	1
M-E	0	1
M-E	0	1
M-E	3	1
M-E	0	1
M-E	3	1
M-E	2	1
M-E	1	1
M-E	4	1
M-E	4	1
M-E	4	1
M-E	2	1
M-E	0	2
M-E	2	2
M-E	1	2
M-E	3	2
M-E	1	2
M-E	2	2
M-E	2	2
M-E	1	2
M-E	1	2
M-E	3	2
M-E	4	2
M-E	4	2
M-E	2	2
M-E	4	2
M-E	4	2
M-E	2	2
M-E	0	2
M-E	4	2
M-E	2	2
M-E	3	2
M-E	2	2
M-E	1	2
M-E	3	2
M-E	1	2
M-E	2	2
M-E	2	2
M-E	1	2
M-E	2	2
M-E	1	2
M-E	3	2
M-E	2	3
M-E	4	3
M-E	1	3
M-E	3	3
M-E	3	3
M-E	2	3
M-E	3	3
M-E	3	3
M-E	3	3
M-E	1	3
M-E	4	3
M-E	3	3
M-E	1	3
M-E	1	3
M-E	1	3
M-E	2	3
M-E	0	3
M-E	4	3
M-E	3	3
M-E	0	3
M-E	3	3
M-E	2	3
M-E	4	3
M-E	5	3
M-E	0	3
M-E	0	3
M-E	3	3
M-E	2	3
M-E	3	3
M-E	2	3
M-E	1	3
M-A	1	1
M-A	1	1
M-A	2	1
M-A	2	1
M-A	0	1
M-A	1	1
M-A	1	1
M-A	2	1
M-A	0	1
M-A	3	1
M-A	2	1
M-A	4	1
M-A	1	1
M-A	2	1
M-A	2	1
M-A	0	1
M-A	0	1
M-A	1	1
M-A	1	1
M-A	0	1
M-A	2	1
M-A	0	1
M-A	3	1
M-A	1	1
M-A	1	1
M-A	3	1
M-A	2	1
M-A	3	1
M-A	1	1
M-A	0	2
M-A	2	2
M-A	1	2
M-A	1	2
M-A	0	2
M-A	1	2
M-A	1	2
M-A	1	2
M-A	0	2
M-A	2	2
M-A	1	2
M-A	3	2
M-A	2	2
M-A	3	2
M-A	1	2
M-A	3	2
M-A	0	2
M-A	1	2
M-A	1	2
M-A	2	2
M-A	1	2
M-A	2	2
M-A	2	2
M-A	1	2
M-A	1	2
M-A	2	2
M-A	2	2
M-A	3	2
M-A	1	2
M-A	2	2
M-A	1	3
M-A	0	3
M-A	2	3
M-A	2	3
M-A	2	3
M-A	1	3
M-A	2	3
M-A	0	3
M-A	1	3
M-A	1	3
M-A	2	3
M-A	1	3
M-A	3	3
M-A	0	3
M-A	0	3
M-A	0	3
M-A	1	3
M-A	1	3
M-A	3	3
M-A	0	3
M-A	1	3
M-A	0	3
M-A	3	3
M-A	4	3
M-A	0	3
M-A	0	3
M-A	2	3
M-A	2	3
M-A	2	3
M-A	1	3
M-A	0	3
M-C	0	1
M-C	0	1
M-C	0	1
M-C	0	1
M-C	0	1
M-C	0	1
M-C	0	1
M-C	0	1
M-C	0	1
M-C	0	1
M-C	0	1
M-C	0	1
M-C	0	1
M-C	0	1
M-C	0	1
M-C	0	1
M-C	0	1
M-C	0	1
M-C	0	1
M-C	0	1
M-C	0	1
M-C	0	1
M-C	0	1
M-C	0	1
M-C	0	1
M-C	0	1
M-C	0	1
M-C	0	1
M-C	0	1
M-C	0	2
M-C	0	2
M-C	0	2
M-C	0	2
M-C	0	2
M-C	0	2
M-C	0	2
M-C	1	2
M-C	0	2
M-C	0	2
M-C	0	2
M-C	0	2
M-C	0	2
M-C	0	2
M-C	0	2
M-C	0	2
M-C	0	2
M-C	0	2
M-C	0	2
M-C	0	2
M-C	0	2
M-C	0	2
M-C	0	2
M-C	0	2
M-C	0	2
M-C	1	2
M-C	0	2
M-C	0	2
M-C	0	2
M-C	0	2
M-C	0	3
M-C	0	3
M-C	0	3
M-C	0	3
M-C	0	3
M-C	0	3
M-C	0	3
M-C	0	3
M-C	0	3
M-C	0	3
M-C	0	3
M-C	0	3
M-C	0	3
M-C	0	3
M-C	0	3
M-C	0	3
M-C	0	3
M-C	0	3
M-C	0	3
M-C	0	3
M-C	0	3
M-C	0	3
M-C	0	3
M-C	0	3
M-C	0	3
M-C	0	3
M-C	0	3
M-C	0	3
M-C	0	3
M-C	0	3
M-C	0	3
NK-D	6	1
NK-D	6	1
NK-D	6	1
NK-D	6	1
NK-D	6	1
NK-D	5	1
NK-D	6	1
NK-D	6	1
NK-D	6	1
NK-D	6	1
NK-D	6	1
NK-D	6	1
NK-D	6	1
NK-D	5	1
NK-D	6	1
NK-D	5	1
NK-D	5	1
NK-D	6	1
NK-D	6	1
NK-D	6	1
NK-D	6	1
NK-D	5	1
NK-D	6	1
NK-D	5	1
NK-D	6	1
NK-D	5	1
NK-D	6	1
NK-D	5	1
NK-D	4	1
NK-D	6	1
NK-D	6	1
NK-D	6	1
NK-D	4	1
NK-D	6	1
NK-D	6	1
NK-D	6	1
NK-D	5	1
NK-D	6	1
NK-D	6	1
NK-D	5	2
NK-D	6	2
NK-D	6	2
NK-D	6	2
NK-D	6	2
NK-D	6	2
NK-D	5	2
NK-D	6	2
NK-D	5	2
NK-D	5	2
NK-D	6	2
NK-D	6	2
NK-D	5	2
NK-D	6	2
NK-D	5	2
NK-D	5	2
NK-D	5	2
NK-D	5	2
NK-D	6	2
NK-D	6	2
NK-D	5	3
NK-D	6	3
NK-D	5	3
NK-D	5	3
NK-D	6	3
NK-D	5	3
NK-D	5	3
NK-D	6	3
NK-D	6	3
NK-D	6	3
NK-D	4	3
NK-D	6	3
NK-D	6	3
NK-D	6	3
NK-D	6	3
NK-D	6	3
NK-D	5	3
NK-D	5	3
NK-D	4	3
NK-D	6	3
NK-E	3	1
NK-E	4	1
NK-E	3	1
NK-E	3	1
NK-E	3	1
NK-E	4	1
NK-E	4	1
NK-E	3	1
NK-E	2	1
NK-E	5	1
NK-E	3	1
NK-E	2	1
NK-E	1	1
NK-E	1	1
NK-E	3	1
NK-E	5	1
NK-E	3	1
NK-E	3	1
NK-E	5	1
NK-E	3	1
NK-E	2	1
NK-E	4	1
NK-E	4	1
NK-E	3	1
NK-E	2	1
NK-E	3	1
NK-E	2	1
NK-E	3	1
NK-E	2	1
NK-E	3	1
NK-E	4	1
NK-E	4	1
NK-E	3	1
NK-E	5	1
NK-E	2	1
NK-E	4	1
NK-E	4	1
NK-E	4	1
NK-E	5	1
NK-E	3	2
NK-E	4	2
NK-E	4	2
NK-E	5	2
NK-E	4	2
NK-E	4	2
NK-E	3	2
NK-E	4	2
NK-E	3	2
NK-E	4	2
NK-E	4	2
NK-E	4	2
NK-E	4	2
NK-E	5	2
NK-E	4	2
NK-E	4	2
NK-E	4	2
NK-E	4	2
NK-E	3	2
NK-E	2	2
NK-E	3	3
NK-E	2	3
NK-E	0	3
NK-E	5	3
NK-E	5	3
NK-E	1	3
NK-E	2	3
NK-E	3	3
NK-E	2	3
NK-E	1	3
NK-E	1	3
NK-E	2	3
NK-E	4	3
NK-E	2	3
NK-E	2	3
NK-E	2	3
NK-E	2	3
NK-E	0	3
NK-E	2	3
NK-E	0	3
NK-A	2	1
NK-A	0	1
NK-A	0	1
NK-A	3	1
NK-A	1	1
NK-A	3	1
NK-A	3	1
NK-A	2	1
NK-A	2	1
NK-A	2	1
NK-A	3	1
NK-A	2	1
NK-A	1	1
NK-A	1	1
NK-A	2	1
NK-A	4	1
NK-A	1	1
NK-A	2	1
NK-A	1	1
NK-A	2	1
NK-A	0	1
NK-A	4	1
NK-A	4	1
NK-A	2	1
NK-A	3	1
NK-A	3	1
NK-A	3	1
NK-A	1	1
NK-A	3	1
NK-A	2	1
NK-A	3	1
NK-A	1	1
NK-A	1	1
NK-A	1	1
NK-A	2	1
NK-A	3	1
NK-A	2	1
NK-A	1	1
NK-A	5	1
NK-A	1	2
NK-A	2	2
NK-A	3	2
NK-A	2	2
NK-A	3	2
NK-A	1	2
NK-A	2	2
NK-A	1	2
NK-A	2	2
NK-A	3	2
NK-A	4	2
NK-A	3	2
NK-A	3	2
NK-A	3	2
NK-A	2	2
NK-A	3	2
NK-A	1	2
NK-A	3	2
NK-A	1	2
NK-A	1	2
NK-A	0	3
NK-A	4	3
NK-A	2	3
NK-A	3	3
NK-A	1	3
NK-A	2	3
NK-A	2	3
NK-A	3	3
NK-A	2	3
NK-A	3	3
NK-A	4	3
NK-A	1	3
NK-A	4	3
NK-A	3	3
NK-A	1	3
NK-A	1	3
NK-A	2	3
NK-A	0	3
NK-A	2	3
NK-A	3	3
NK-C	0	1
NK-C	0	1
NK-C	0	1
NK-C	0	1
NK-C	0	1
NK-C	0	1
NK-C	0	1
NK-C	0	1
NK-C	0	1
NK-C	0	1
NK-C	0	1
NK-C	0	1
NK-C	0	1
NK-C	0	1
NK-C	0	1
NK-C	0	1
NK-C	0	1
NK-C	0	1
NK-C	0	1
NK-C	0	1
NK-C	0	1
NK-C	0	1
NK-C	0	1
NK-C	0	1
NK-C	0	1
NK-C	0	1
NK-C	0	1
NK-C	0	1
NK-C	0	1
NK-C	0	1
NK-C	0	1
NK-C	0	1
NK-C	0	1
NK-C	0	1
NK-C	0	1
NK-C	0	1
NK-C	0	1
NK-C	0	1
NK-C	0	1
NK-C	0	2
NK-C	0	2
NK-C	2	2
NK-C	0	2
NK-C	0	2
NK-C	0	2
NK-C	0	2
NK-C	0	2
NK-C	0	2
NK-C	0	2
NK-C	0	2
NK-C	0	2
NK-C	0	2
NK-C	0	2
NK-C	0	2
NK-C	0	2
NK-C	0	2
NK-C	0	2
NK-C	1	2
NK-C	0	2
NK-C	0	3
NK-C	0	3
NK-C	0	3
NK-C	1	3
NK-C	0	3
NK-C	0	3
NK-C	0	3
NK-C	0	3
NK-C	0	3
NK-C	0	3
NK-C	0	3
NK-C	0	3
NK-C	0	3
NK-C	0	3
NK-C	0	3
NK-C	0	3
NK-C	0	3
NK-C	0	3
NK-C	0	3
NK-C	0	3
