# Supplementary material for: Protein engineering expands the effector recognition profile of a rice NLR immune receptor
Source: eLife. 2019 Sep 19;8:e47713. doi: 10.7554/eLife.47713 (PMC6768660; doi:10.7554/eLife.47713)
Supplement: Figure 1—source data 2. [file elife-47713-fig1-data2.xlsx]

## Sheet: Sheet1
Sample	Effector	T0	TF	Conductivity	Replica		Sample	Effector	T0	TF	Conductivity	Replica		Sample	Effector	T0	TF	Conductivity	Replica
P-D		0	117	117	1	198.25	NK-D		7	370	363	1	285.175	M-D		8	212	204	1	207
P-D		8	217	209	2		NK-D		28	464	436	2		M-D		1	113	112	2
P-D		10	311	301	3		NK-D		4	260	256	3		M-D		8	165	157	3
P-D		15	145	130	4		NK-D		0	362	362	4		M-D		2	171	169	4
P-D		10	51	41	5		NK-D		19	293	274	5		M-D		1	187	186	5
P-D		1	181	180	6		NK-D		15	162	147	6		M-D		10	228	218	6
P-D		9	165	156	7		NK-D		19	165	146	7		M-D		8	64	56	7
P-D		15	283	268	8		NK-D		17	266	249	8		M-D		32	328	296	8
P-D		16	182	166	9		NK-D		23	403	380	9		M-D		16	258	242	9
P-D		9	176	167	10		NK-D		13	230	217	10		M-D		32	300	268	10
P-D		8	355	347	11		NK-D		19	424	405	11		M-D		13	184	171	11
P-D		9	258	249	12		NK-D		16	260	244	12		M-D		14	208	194	12
P-D		12	104	92	13		NK-D		14	354	340	13		M-D		11	55	44	13
P-D		15	88	73	14		NK-D		12	223	211	14		M-D		22	311	289	14
P-D		15	156	141	15		NK-D		17	336	319	15		M-D		11	68	57	15
P-D		4	282	278	16		NK-D		21	238	217	16		M-D		19	337	318	16
P-D		4	225	221	17		NK-D		8	341	333	17		M-D		26	219	193	17
P-D		9	223	214	18		NK-D		16	314	298	18		M-D		15	116	101	18
P-D		9	141	132	19		NK-D		8	384	376	19		M-D		15	179	164	19
P-D		8	137	129	20		NK-D		8	283	275	20		M-D		10	282	272	20
P-D		20	266	246	21		NK-D		28	322	294	21		M-D		14	335	321	21
P-D		10	315	305	22		NK-D		24	360	336	22		M-D		25	197	172	22
P-D		9	290	281	23		NK-D		26	358	332	23		M-D		21	330	309	23
P-D		6	144	138	24		NK-D		19	366	347	24		M-D		15	119	104	24
P-D		7	257	250	25		NK-D		17	238	221	25		M-D		26	219	193	25
P-D		27	186	159	26		NK-D		21	212	191	26		M-D		12	289	277	26
P-D		26	422	396	27		NK-D		23	255	232	27		M-D		15	190	175	27
P-D		21	238	217	28		NK-D		26	214	188	28		M-D		11	311	300	28
P-D		21	187	166	29		NK-D		30	242	212	29		M-D		14	84	70	29
P-D		19	98	79	30		NK-D		19	374	355	30		M-D		12	98	86	30
P-D		10	56	46	31		NK-D		33	295	262	31		M-D		26	287	261	31
P-D		16	113	97	32		NK-D		18	257	239	32		M-D		21	91	70	32
P-D		20	84	64	33		NK-D		35	280	245	33		M-D		23	190	167	33
P-D		20	156	136	34		NK-D		30	302	272	34		M-D		45	343	298	34
P-D		14	86	72	35		NK-D		30	341	311	35		M-D		22	162	140	35
P-D		26	420	394	36		NK-D		20	290	270	36		M-D		17	283	266	36
P-D		68	532	464	37		NK-D		28	313	285	37		M-D		14	282	268	37
P-D		18	296	278	38		NK-D		25	304	279	38		M-D		22	376	354	38
P-D		10	197	187	39		NK-D		19	376	357	39		M-D		14	340	326	39
P-D		21	365	344	40		NK-D		21	352	331	40		M-D		20	432	412	40
P-E		6	48	42	1	44.675	NK-E		4	226	222	1	121.525	M-E		1	164	163	1	107.325
P-E		7	41	34	2		NK-E		14	74	60	2		M-E		1	35	34	2
P-E		15	50	35	3		NK-E		3	52	49	3		M-E		6	45	39	3
P-E		10	67	57	4		NK-E		4	222	218	4		M-E		2	124	122	4
P-E		21	60	39	5		NK-E		6	100	94	5		M-E		3	141	138	5
P-E		1	53	52	6		NK-E		9	48	39	6		M-E		10	72	62	6
P-E		3	62	59	7		NK-E		12	59	47	7		M-E		8	66	58	7
P-E		10	58	48	8		NK-E		8	30	22	8		M-E		10	94	84	8
P-E		7	45	38	9		NK-E		10	120	110	9		M-E		18	244	226	9
P-E		4	66	62	10		NK-E		8	37	29	10		M-E		11	198	187	10
P-E		13	61	48	11		NK-E		8	190	182	11		M-E		10	123	113	11
P-E		9	60	51	12		NK-E		6	59	53	12		M-E		3	175	172	12
P-E		17	42	25	13		NK-E		12	94	82	13		M-E		7	38	31	13
P-E		19	54	35	14		NK-E		12	63	51	14		M-E		7	177	170	14
P-E		14	73	59	15		NK-E		11	87	76	15		M-E		8	33	25	15
P-E		4	37	33	16		NK-E		3	65	62	16		M-E		13	148	135	16
P-E		9	58	49	17		NK-E		10	156	146	17		M-E		9	48	39	17
P-E		10	64	54	18		NK-E		18	168	150	18		M-E		12	43	31	18
P-E		7	47	40	19		NK-E		8	111	103	19		M-E		16	103	87	19
P-E		10	54	44	20		NK-E		6	61	55	20		M-E		8	113	105	20
P-E		18	72	54	21		NK-E		17	167	150	21		M-E		17	168	151	21
P-E		7	48	41	22		NK-E		20	165	145	22		M-E		16	102	86	22
P-E		7	41	34	23		NK-E		13	66	53	23		M-E		21	160	139	23
P-E		9	43	34	24		NK-E		17	270	253	24		M-E		10	54	44	24
P-E		8	58	50	25		NK-E		9	173	164	25		M-E		12	95	83	25
P-E		17	63	46	26		NK-E		17	147	130	26		M-E		15	153	138	26
P-E		24	73	49	27		NK-E		15	154	139	27		M-E		14	92	78	27
P-E		20	59	39	28		NK-E		15	72	57	28		M-E		19	221	202	28
P-E		17	59	42	29		NK-E		15	71	56	29		M-E		11	55	44	29
P-E		25	57	32	30		NK-E		19	178	159	30		M-E		8	96	88	30
P-E		15	49	34	31		NK-E		25	233	208	31		M-E		12	98	86	31
P-E		15	46	31	32		NK-E		8	50	42	32		M-E		20	61	41	32
P-E		25	65	40	33		NK-E		18	109	91	33		M-E		11	79	68	33
P-E		23	60	37	34		NK-E		17	162	145	34		M-E		23	178	155	34
P-E		18	71	53	35		NK-E		14	152	138	35		M-E		12	143	131	35
P-E		16	51	35	36		NK-E		11	231	220	36		M-E		19	249	230	36
P-E		23	109	86	37		NK-E		17	320	303	37		M-E		9	91	82	37
P-E		21	52	31	38		NK-E		22	109	87	38		M-E		17	93	76	38
P-E		12	69	57	39		NK-E		19	249	230	39		M-E		8	98	90	39
P-E		12	70	58	40		NK-E		12	253	241	40		M-E		10	270	260	40
P-A		14	55	41	1	45.2	NK-A		4	94	90	1	119.8	M-A		22	233	211	1	95.675
P-A		6	44	38	2		NK-A		12	179	167	2		M-A		2	30	28	2
P-A		13	57	44	3		NK-A		0	79	79	3		M-A		6	47	41	3
P-A		7	52	45	4		NK-A		1	212	211	4		M-A		2	44	42	4
P-A		9	45	36	5		NK-A		2	141	139	5		M-A		8	153	145	5
P-A		1	44	43	6		NK-A		11	181	170	6		M-A		6	59	53	6
P-A		7	64	57	7		NK-A		8	110	102	7		M-A		3	69	66	7
P-A		9	68	59	8		NK-A		2	70	68	8		M-A		8	113	105	8
P-A		7	47	40	9		NK-A		12	96	84	9		M-A		9	88	79	9
P-A		11	61	50	10		NK-A		13	51	38	10		M-A		12	209	197	10
P-A		30	69	39	11		NK-A		9	230	221	11		M-A		5	38	33	11
P-A		8	60	52	12		NK-A		0	55	55	12		M-A		1	76	75	12
P-A		20	54	34	13		NK-A		8	68	60	13		M-A		2	37	35	13
P-A		17	53	36	14		NK-A		9	77	68	14		M-A		7	177	170	14
P-A		21	60	39	15		NK-A		7	60	53	15		M-A		8	33	25	15
P-A		10	48	38	16		NK-A		5	76	71	16		M-A		14	128	114	16
P-A		3	55	52	17		NK-A		12	138	126	17		M-A		16	72	56	17
P-A		11	48	37	18		NK-A		12	158	146	18		M-A		12	42	30	18
P-A		11	63	52	19		NK-A		12	199	187	19		M-A		14	99	85	19
P-A		12	43	31	20		NK-A		8	54	46	20		M-A		6	130	124	20
P-A		19	77	58	21		NK-A		19	87	68	21		M-A		12	78	66	21
P-A		7	51	44	22		NK-A		10	60	50	22		M-A		15	187	172	22
P-A		9	48	39	23		NK-A		8	47	39	23		M-A		13	140	127	23
P-A		12	44	32	24		NK-A		11	84	73	24		M-A		9	68	59	24
P-A		11	53	42	25		NK-A		13	174	161	25		M-A		15	68	53	25
P-A		16	56	40	26		NK-A		19	233	214	26		M-A		8	58	50	26
P-A		13	75	62	27		NK-A		13	84	71	27		M-A		13	59	46	27
P-A		17	56	39	28		NK-A		22	57	35	28		M-A		14	229	215	28
P-A		9	49	40	29		NK-A		32	186	154	29		M-A		11	55	44	29
P-A		27	79	52	30		NK-A		14	119	105	30		M-A		13	67	54	30
P-A		11	32	21	31		NK-A		15	92	77	31		M-A		19	78	59	31
P-A		18	73	55	32		NK-A		9	173	164	32		M-A		13	68	55	32
P-A		30	71	41	33		NK-A		17	155	138	33		M-A		25	89	64	33
P-A		21	70	49	34		NK-A		19	173	154	34		M-A		18	247	229	34
P-A		18	54	36	35		NK-A		18	97	79	35		M-A		19	121	102	35
P-A		12	52	40	36		NK-A		8	126	118	36		M-A		10	223	213	36
P-A		25	95	70	37		NK-A		11	357	346	37		M-A		5	46	41	37
P-A		24	74	50	38		NK-A		18	276	258	38		M-A		19	186	167	38
P-A		13	91	78	39		NK-A		8	68	60	39		M-A		7	135	128	39
P-A		10	67	57	40		NK-A		9	256	247	40		M-A		11	180	169	40
P-C		11	42	31	1	43.45	NK-C		4	54	50	1	44.75	M-C		3	82	79	1	46.325
P-C		9	38	29	2		NK-C		4	44	40	2		M-C		2	47	45	2
P-C		0	53	53	3		NK-C		0	44	44	3		M-C		2	39	37	3
P-C		10	49	39	4		NK-C		1	57	56	4		M-C		2	49	47	4
P-C		80	122	42	5		NK-C		0	42	42	5		M-C		3	45	42	5
P-C		6	45	39	6		NK-C		9	29	20	6		M-C		32	56	24	6
P-C		1	57	56	7		NK-C		4	38	34	7		M-C		1	62	61	7
P-C		3	52	49	8		NK-C		2	39	37	8		M-C		3	41	38	8
P-C		2	48	46	9		NK-C		1	46	45	9		M-C		3	47	44	9
P-C		10	57	47	10		NK-C		7	48	41	10		M-C		7	67	60	10
P-C		12	58	46	11		NK-C		3	75	72	11		M-C		14	46	32	11
P-C		6	59	53	12		NK-C		7	49	42	12		M-C		1	62	61	12
P-C		13	35	22	13		NK-C		2	49	47	13		M-C		2	38	36	13
P-C		8	48	40	14		NK-C		9	45	36	14		M-C		1	46	45	14
P-C		19	62	43	15		NK-C		7	50	43	15		M-C		12	38	26	15
P-C		2	33	31	16		NK-C		8	50	42	16		M-C		16	51	35	16
P-C		11	66	55	17		NK-C		13	55	42	17		M-C		12	70	58	17
P-C		12	53	41	18		NK-C		15	75	60	18		M-C		10	38	28	18
P-C		11	62	51	19		NK-C		12	65	53	19		M-C		10	57	47	19
P-C		12	45	33	20		NK-C		10	50	40	20		M-C		9	49	40	20
P-C		16	51	35	21		NK-C		28	73	45	21		M-C		10	54	44	21
P-C		12	50	38	22		NK-C		24	73	49	22		M-C		13	67	54	22
P-C		10	58	48	23		NK-C		26	40	14	23		M-C		14	67	53	23
P-C		9	38	29	24		NK-C		19	59	40	24		M-C		10	34	24	24
P-C		12	53	41	25		NK-C		17	56	39	25		M-C		16	47	31	25
P-C		15	63	48	26		NK-C		14	67	53	26		M-C		8	43	35	26
P-C		9	78	69	27		NK-C		10	74	64	27		M-C		11	58	47	27
P-C		20	65	45	28		NK-C		17	44	27	28		M-C		14	92	78	28
P-C		17	41	24	29		NK-C		18	49	31	29		M-C		12	56	44	29
P-C		31	78	47	30		NK-C		16	62	46	30		M-C		6	64	58	30
P-C		16	46	30	31		NK-C		10	50	40	31		M-C		12	58	46	31
P-C		13	51	38	32		NK-C		6	65	59	32		M-C		19	57	38	32
P-C		27	72	45	33		NK-C		21	73	52	33		M-C		14	63	49	33
P-C		18	69	51	34		NK-C		13	64	51	34		M-C		10	64	54	34
P-C		24	64	40	35		NK-C		11	40	29	35		M-C		6	59	53	35
P-C		9	68	59	36		NK-C		6	45	39	36		M-C		11	54	43	36
P-C		13	60	47	37		NK-C		6	94	88	37		M-C		3	54	51	37
P-C		18	56	38	38		NK-C		11	58	47	38		M-C		10	55	45	38
P-C		12	75	63	39		NK-C		8	49	41	39		M-C		5	42	37	39
P-C		12	69	57	40		NK-C		4	54	50	40		M-C		3	87	84	40
