# Supplementary material for: Protein engineering expands the effector recognition profile of a rice NLR immune receptor
Source: eLife. 2019 Sep 19;8:e47713. doi: 10.7554/eLife.47713 (PMC6768660; doi:10.7554/eLife.47713)
Supplement: Figure 2—figure supplement 2—source data 1. [file elife-47713-fig2-figsupp2-data1.xlsx]

## Sheet: Sheet1
Sample	Rmax	Replica	Tech_replica		Sample	Rmax	Replica	Tech_replica
P-D	22.1	1	1		NK-D	34.7	1	1
P-D	21.2	1	2		NK-D	33.5	1	2
P-D	21.1	1	3		NK-D	34.2	1	3
P-D	20.6	2	1		NK-D	34.1	2	1
P-D	21.4	2	2		NK-D	34	2	2
P-D	21.8	2	3		NK-D	34.8	2	3
P-D	9.4	3	1		NK-D	26.2	3	1
P-D	12.3	3	2		NK-D	28	3	2
P-D	13	3	3		NK-D	30	3	3
P-E	2.6	1	1		NK-E	14.6	1	1
P-E	2.8	1	2		NK-E	14.6	1	2
P-E	3.1	1	3		NK-E	14.7	1	3
P-E	9.2	2	1		NK-E	14.3	2	1
P-E	11.1	2	2		NK-E	13.9	2	2
P-E	11.8	2	3		NK-E	14.9	2	3
P-E	-0.2	3	1		NK-E	17.9	3	1
P-E	4	3	2		NK-E	16.7	3	2
P-E	5.1	3	3		NK-E	17.6	3	3
P-A	1.8	1	1		NK-A	19.8	1	1
P-A	1.7	1	2		NK-A	19.4	1	2
P-A	1.9	1	3		NK-A	19.8	1	3
P-A	3.1	2	1		NK-A	16.7	2	1
P-A	4.2	2	2		NK-A	17.1	2	2
P-A	5	2	3		NK-A	18.3	2	3
P-A	0.4	3	1		NK-A	17.2	3	1
P-A	0.6	3	2		NK-A	16.1	3	2
P-A	0.5	3	3		NK-A	16.1	3	3
P-C	0	1	1		NK-C	10.8	1	1
P-C	-0.2	1	2		NK-C	10.4	1	2
P-C	-0.1	1	3		NK-C	10.6	1	3
P-C	-4.6	2	1		NK-C	5.4	2	1
P-C	-4	2	2		NK-C	6.7	2	2
P-C	0.7	2	3		NK-C	8.3	2	3
P-C	1.1	3	1		NK-C	9.8	3	1
P-C	1.4	3	2		NK-C	8.7	3	2
P-C	1.6	3	3		NK-C	8.1	3	3
