# Supplementary material for: Protein engineering expands the effector recognition profile of a rice NLR immune receptor
Source: eLife. 2019 Sep 19;8:e47713. doi: 10.7554/eLife.47713 (PMC6768660; doi:10.7554/eLife.47713)
Supplement: Figure 2—figure supplement 2—source data 2. [file elife-47713-fig2-figsupp2-data2.xlsx]

## Sheet: Sheet1
Sample	Rmax	Replica	Tech_replica		Sample	Rmax	Replica	Tech_replica
P-D	82.8	1	1		NK-D	78.5	1	1
P-D	82	1	2		NK-D	78.7	1	2
P-D	80.7	1	3		NK-D	78.9	1	3
P-D	63.4	2	1		NK-D	60.3	2	1
P-D	66.7	2	2		NK-D	63.3	2	2
P-D	66.8	2	3		NK-D	66	2	3
P-D	68.5	3	1		NK-D	70.6	3	1
P-D	73.2	3	2		NK-D	73.4	3	2
P-D	76.9	3	3		NK-D	76.2	3	3
P-E	50.8	1	1		NK-E	62.6	1	1
P-E	50.1	1	2		NK-E	62.6	1	2
P-E	49.8	1	3		NK-E	63.6	1	3
P-E	52.6	2	1		NK-E	57.4	2	1
P-E	53.2	2	2		NK-E	55.6	2	2
P-E	54.9	2	3		NK-E	54.9	2	3
P-E	58.2	3	1		NK-E	48.2	3	1
P-E	52.4	3	2		NK-E	44.8	3	2
P-E	48.2	3	3		NK-E	44.2	3	3
P-A	37.1	1	1		NK-A	59.1	1	1
P-A	36.6	1	2		NK-A	58.4	1	2
P-A	35.2	1	3		NK-A	58	1	3
P-A	22.9	2	1		NK-A	48.7	2	1
P-A	25.9	2	2		NK-A	49	2	2
P-A	28.4	2	3		NK-A	51.9	2	3
P-A	19.8	3	1		NK-A	39.3	3	1
P-A	20.2	3	2		NK-A	38.9	3	2
P-A	20.8	3	3		NK-A	38.7	3	3
P-C	2.5	1	1		NK-C	53.8	1	1
P-C	2.5	1	2		NK-C	52.7	1	2
P-C	2.5	1	3		NK-C	52.2	1	3
P-C	3.9	2	1		NK-C	48.5	2	1
P-C	2.5	2	2		NK-C	48.1	2	2
P-C	4.7	2	3		NK-C	47.1	2	3
P-C	7.4	3	1		NK-C	42.5	3	1
P-C	7.7	3	2		NK-C	39.6	3	2
P-C	7.6	3	3		NK-C	38.1	3	3
