# Supplementary material for: Protein engineering expands the effector recognition profile of a rice NLR immune receptor
Source: eLife. 2019 Sep 19;8:e47713. doi: 10.7554/eLife.47713 (PMC6768660; doi:10.7554/eLife.47713)
Supplement: Figure 2—figure supplement 3—source data 1. [file elife-47713-fig2-figsupp3-data1.xlsx]

## Sheet: Fig2 Supp3 4nM
Sample	Effector	Conc	Rmax	Replica	HMA
NK-D	1	4	34.7	1	B
NK-D	1	4	33.5	1	B
NK-D	1	4	34.2	1	B
NK-D	1	4	34.1	2	B
NK-D	1	4	34	2	B
NK-D	1	4	34.8	2	B
NK-D	1	4	26.2	3	B
NK-D	1	4	28	3	B
NK-D	1	4	30	3	B
NK-E	2	4	14.6	1	B
NK-E	2	4	14.6	1	B
NK-E	2	4	14.7	1	B
NK-E	2	4	14.3	2	B
NK-E	2	4	13.9	2	B
NK-E	2	4	14.9	2	B
NK-E	2	4	17.9	3	B
NK-E	2	4	16.7	3	B
NK-E	2	4	17.6	3	B
NK-A	3	4	19.8	1	B
NK-A	3	4	19.4	1	B
NK-A	3	4	19.8	1	B
NK-A	3	4	16.7	2	B
NK-A	3	4	17.1	2	B
NK-A	3	4	18.3	2	B
NK-A	3	4	17.2	3	B
NK-A	3	4	16.1	3	B
NK-A	3	4	16.1	3	B
NK-C	4	4	10.8	1	B
NK-C	4	4	10.4	1	B
NK-C	4	4	10.6	1	B
NK-C	4	4	5.4	2	B
NK-C	4	4	6.7	2	B
NK-C	4	4	8.3	2	B
NK-C	4	4	9.8	3	B
NK-C	4	4	8.7	3	B
NK-C	4	4	8.1	3	B
M-D	1	4	17.0475	1	A
M-D	1	4	17.5522	1	A
M-D	1	4	18.0726	1	A
M-D	1	4	17.051	2	A
M-D	1	4	17.264	2	A
M-D	1	4	16.7846	2	A
M-E	2	4	7.07026	1	A
M-E	2	4	7.64736	1	A
M-E	2	4	6.31774	1	A
M-E	2	4	1.20983	2	A
M-E	2	4	4.80891	2	A
M-E	2	4	6.69788	2	A
M-A	3	4	2.56279	1	A
M-A	3	4	2.31932	1	A
M-A	3	4	2.95027	1	A
M-A	3	4	0.808619	2	A
M-A	3	4	3.37487	2	A
M-A	3	4	-5.42819	2	A
M-C	4	4	-0.61971	1	A
M-C	4	4	-0.311173	1	A
M-C	4	4	0.0999307	1	A
M-C	4	4	-2.98383	2	A
M-C	4	4	-1.20893	2	A

## Sheet: Fig2 Supp3 40nM
Sample	Effector	Conc	Rmax	Replica	HMA
M-D	1	40	67.69	2	A
M-D	1	40	67.67	2	A
M-D	1	40	68.19	2	A
M-D	1	40	58.86	3	A
M-D	1	40	61.82	3	A
M-D	1	40	62.63	3	A
M-E	2	40	36.58	2	A
M-E	2	40	36.85	2	A
M-E	2	40	36.65	2	A
M-E	2	40	29.19	3	A
M-E	2	40	30.4	3	A
M-E	2	40	35.28	3	A
M-A	3	40	20.43	2	A
M-A	3	40	20.3	2	A
M-A	3	40	20.49	2	A
M-A	3	40	10.69	3	A
M-A	3	40	12.74	3	A
M-A	3	40	16.19	3	A
M-C	4	40	1.76	2	A
M-C	4	40	2.17	2	A
M-C	4	40	2.59	2	A
M-C	4	40	-3.08	3	A
M-C	4	40	2.04	3	A
M-C	4	40	2.9	3	A
NK-D	1	40	68.7	1	B
NK-D	1	40	68.5	1	B
NK-D	1	40	69	1	B
NK-D	1	40	51.1	2	B
NK-D	1	40	51.2	2	B
NK-D	1	40	51.8	2	B
NK-D	1	40	61.7	3	B
NK-D	1	40	62.3	3	B
NK-D	1	40	64.6	3	B
NK-E	2	40	51.1	1	B
NK-E	2	40	50.8	1	B
NK-E	2	40	50.7	1	B
NK-E	2	40	46.5	2	B
NK-E	2	40	44.7	2	B
NK-E	2	40	44.5	2	B
NK-E	2	40	42.7	3	B
NK-E	2	40	38.6	3	B
NK-E	2	40	37	3	B
NK-A	3	40	52	1	B
NK-A	3	40	50.9	1	B
NK-A	3	40	50.5	1	B
NK-A	3	40	43.3	2	B
NK-A	3	40	42.7	2	B
NK-A	3	40	43.4	2	B
NK-A	3	40	32.1	3	B
NK-A	3	40	31.5	3	B
NK-A	3	40	31.6	3	B
NK-C	4	40	41.8	1	B
NK-C	4	40	40.5	1	B
NK-C	4	40	39.9	1	B
NK-C	4	40	32.9	2	B
NK-C	4	40	32.5	2	B
NK-C	4	40	31.7	2	B
NK-C	4	40	33.6	3	B
NK-C	4	40	30.4	3	B
NK-C	4	40	28.8	3	B

## Sheet: Fig2 Supp3 100nM
Sample	Effector	Conc	Rmax	Replica	HMA
NK-D	1	100	78.5	1	B
NK-D	1	100	78.7	1	B
NK-D	1	100	78.9	1	B
NK-D	1	100	60.3	2	B
NK-D	1	100	63.3	2	B
NK-D	1	100	66	2	B
NK-D	1	100	70.6	3	B
NK-D	1	100	73.4	3	B
NK-D	1	100	76.2	3	B
NK-E	2	100	62.6	1	B
NK-E	2	100	62.6	1	B
NK-E	2	100	63.6	1	B
NK-E	2	100	57.4	2	B
NK-E	2	100	55.6	2	B
NK-E	2	100	54.9	2	B
NK-E	2	100	48.2	3	B
NK-E	2	100	44.8	3	B
NK-E	2	100	44.2	3	B
NK-A	3	100	59.1	1	B
NK-A	3	100	58.4	1	B
NK-A	3	100	58	1	B
NK-A	3	100	48.7	2	B
NK-A	3	100	49	2	B
NK-A	3	100	51.9	2	B
NK-A	3	100	39.3	3	B
NK-A	3	100	38.9	3	B
NK-A	3	100	38.7	3	B
NK-C	4	100	53.8	1	B
NK-C	4	100	52.7	1	B
NK-C	4	100	52.2	1	B
NK-C	4	100	48.5	2	B
NK-C	4	100	48.1	2	B
NK-C	4	100	47.1	2	B
NK-C	4	100	42.5	3	B
NK-C	4	100	39.6	3	B
NK-C	4	100	38.1	3	B
M-D	1	100	73.2845	1	A
M-D	1	100	72.9461	1	A
M-D	1	100	73.6053	1	A
M-D	1	100	64.3279	2	A
M-D	1	100	67.2185	2	A
M-D	1	100	67.409	2	A
M-E	2	100	50.9105	1	A
M-E	2	100	50.8557	1	A
M-E	2	100	50.6644	1	A
M-E	2	100	38.7891	2	A
M-E	2	100	43.2708	2	A
M-E	2	100	44.9655	2	A
M-A	3	100	33.8509	1	A
M-A	3	100	33.5796	1	A
M-A	3	100	33.9059	1	A
M-A	3	100	26.8999	2	A
M-A	3	100	25.6606	2	A
M-A	3	100	8.55297	2	A
M-C	4	100	-1.87132	1	A
M-C	4	100	0.506121	1	A
M-C	4	100	0.818342	1	A
M-C	4	100	-2.41817	2	A
M-C	4	100	-0.820114	2	A
M-C	4	100	1.66029	2	A
