# Supplementary material for: Protein engineering expands the effector recognition profile of a rice NLR immune receptor
Source: eLife. 2019 Sep 19;8:e47713. doi: 10.7554/eLife.47713 (PMC6768660; doi:10.7554/eLife.47713)
Supplement: Figure 2—source data 1. [file elife-47713-fig2-data1.xlsx]

## Sheet: Sheet1
Sample	Rmax	Replica	Tech_replica		Sample	Rmax	Replica	Tech_replica
P-D	67	1	1		NK-D	68.7	1	1
P-D	66.6	1	2		NK-D	68.5	1	2
P-D	66	1	3		NK-D	69	1	3
P-D	54.7	2	1		NK-D	51.1	2	1
P-D	55.9	2	2		NK-D	51.2	2	2
P-D	55.8	2	3		NK-D	51.8	2	3
P-D	48.8	3	1		NK-D	61.7	3	1
P-D	57.1	3	2		NK-D	62.3	3	2
P-D	56.5	3	3		NK-D	64.6	3	3
P-E	25.2	1	1		NK-E	51.1	1	1
P-E	24.8	1	2		NK-E	50.8	1	2
P-E	24.4	1	3		NK-E	50.7	1	3
P-E	31.7	2	1		NK-E	46.5	2	1
P-E	33.3	2	2		NK-E	44.7	2	2
P-E	33.5	2	3		NK-E	44.5	2	3
P-E	35.2	3	1		NK-E	42.7	3	1
P-E	31.3	3	2		NK-E	38.6	3	2
P-E	28.5	3	3		NK-E	37	3	3
P-A	15.6	1	1		NK-A	52	1	1
P-A	16	1	2		NK-A	50.9	1	2
P-A	15.6	1	3		NK-A	50.5	1	3
P-A	11.1	2	1		NK-A	43.3	2	1
P-A	13.8	2	2		NK-A	42.7	2	2
P-A	14.2	2	3		NK-A	43.4	2	3
P-A	8.6	3	1		NK-A	32.1	3	1
P-A	8.9	3	2		NK-A	31.5	3	2
P-A	9	3	3		NK-A	31.6	3	3
P-C	0.7	1	1		NK-C	41.8	1	1
P-C	1.1	1	2		NK-C	40.5	1	2
P-C	0.9	1	3		NK-C	39.9	1	3
P-C	0.2	2	1		NK-C	32.9	2	1
P-C	1	2	2		NK-C	32.5	2	2
P-C	1.7	2	3		NK-C	31.7	2	3
P-C	3.4	3	1		NK-C	33.6	3	1
P-C	3.7	3	2		NK-C	30.4	3	2
P-C	3.8	3	3		NK-C	28.8	3	3
