# Supplementary material for: Protein engineering expands the effector recognition profile of a rice NLR immune receptor
Source: eLife. 2019 Sep 19;8:e47713. doi: 10.7554/eLife.47713 (PMC6768660; doi:10.7554/eLife.47713)
Supplement: Figure 4—source data 1. [file elife-47713-fig4-data1.xlsx]

## Sheet: HR-NK-mutants dot t2
treatment	Score	Replicate
NK-D	6	1
NK-D	6	1
NK-D	6	1
NK-D	6	1
NK-D	6	1
NK-D	5	1
NK-D	6	1
NK-D	6	1
NK-D	6	1
NK-D	6	1
NK-D	6	1
NK-D	6	1
NK-D	6	1
NK-D	5	1
NK-D	6	1
NK-D	5	1
NK-D	5	1
NK-D	6	1
NK-D	6	1
NK-D	6	1
NK-D	6	1
NK-D	5	1
NK-D	6	1
NK-D	5	1
NK-D	6	1
NK-D	5	1
NK-D	6	1
NK-D	5	1
NK-D	4	1
NK-D	6	1
NK-D	6	1
NK-D	6	1
NK-D	4	1
NK-D	6	1
NK-D	6	1
NK-D	6	1
NK-D	5	1
NK-D	6	1
NK-D	6	1
NK-D	5	2
NK-D	6	2
NK-D	6	2
NK-D	6	2
NK-D	6	2
NK-D	6	2
NK-D	5	2
NK-D	6	2
NK-D	5	2
NK-D	5	2
NK-D	6	2
NK-D	6	2
NK-D	5	2
NK-D	6	2
NK-D	5	2
NK-D	5	2
NK-D	5	2
NK-D	5	2
NK-D	6	2
NK-D	6	2
NK-D	5	3
NK-D	6	3
NK-D	5	3
NK-D	5	3
NK-D	6	3
NK-D	5	3
NK-D	5	3
NK-D	6	3
NK-D	6	3
NK-D	6	3
NK-D	4	3
NK-D	6	3
NK-D	6	3
NK-D	6	3
NK-D	6	3
NK-D	6	3
NK-D	5	3
NK-D	5	3
NK-D	4	3
NK-D	6	3
NK-H46	0	1
NK-H46	0	1
NK-H46	0	1
NK-H46	0	1
NK-H46	1	1
NK-H46	0	1
NK-H46	0	1
NK-H46	0	1
NK-H46	0	1
NK-H46	0	1
NK-H46	0	1
NK-H46	0	1
NK-H46	0	1
NK-H46	0	1
NK-H46	0	1
NK-H46	0	1
NK-H46	0	1
NK-H46	0	1
NK-H46	0	1
NK-H46	0	1
NK-H46	0	1
NK-H46	0	1
NK-H46	0	1
NK-H46	0	1
NK-H46	0	1
NK-H46	0	1
NK-H46	0	1
NK-H46	0	1
NK-H46	0	1
NK-H46	0	1
NK-H46	2	1
NK-H46	0	1
NK-H46	0	1
NK-H46	1	1
NK-H46	0	1
NK-H46	0	1
NK-H46	0	1
NK-H46	0	1
NK-H46	0	1
NK-H46	0	2
NK-H46	0	2
NK-H46	0	2
NK-H46	0	2
NK-H46	0	2
NK-H46	0	2
NK-H46	0	2
NK-H46	0	2
NK-H46	1	2
NK-H46	0	2
NK-H46	0	2
NK-H46	0	2
NK-H46	0	2
NK-H46	0	2
NK-H46	0	2
NK-H46	0	2
NK-H46	0	2
NK-H46	1	2
NK-H46	1	2
NK-H46	1	2
NK-H46	0	3
NK-H46	1	3
NK-H46	0	3
NK-H46	0	3
NK-H46	2	3
NK-H46	0	3
NK-H46	1	3
NK-H46	1	3
NK-H46	1	3
NK-H46	0	3
NK-H46	0	3
NK-H46	0	3
NK-H46	1	3
NK-H46	0	3
NK-H46	1	3
NK-H46	0	3
NK-H46	0	3
NK-H46	1	3
NK-H46	1	3
NK-H46	0	3
NK-D2	5	1
NK-D2	5	1
NK-D2	5	1
NK-D2	5	1
NK-D2	5	1
NK-D2	5	1
NK-D2	5	1
NK-D2	5	1
NK-D2	5	1
NK-D2	5	1
NK-D2	5	1
NK-D2	5	1
NK-D2	5	1
NK-D2	5	1
NK-D2	5	1
NK-D2	5	1
NK-D2	5	1
NK-D2	5	1
NK-D2	5	1
NK-D2	5	1
NK-D2	5	1
NK-D2	5	1
NK-D2	5	1
NK-D2	5	1
NK-D2	5	1
NK-D2	5	1
NK-D2	5	1
NK-D2	5	1
NK-D2	5	1
NK-D2	5	1
NK-D2	6	2
NK-D2	6	2
NK-D2	6	2
NK-D2	6	2
NK-D2	6	2
NK-D2	6	2
NK-D2	6	2
NK-D2	6	2
NK-D2	6	2
NK-D2	6	2
NK-D2	6	2
NK-D2	6	2
NK-D2	6	2
NK-D2	6	2
NK-D2	6	2
NK-D2	6	2
NK-D2	6	2
NK-D2	6	2
NK-D2	6	2
NK-D2	6	2
NK-D2	6	2
NK-D2	6	2
NK-D2	6	2
NK-D2	6	2
NK-D2	6	2
NK-D2	6	2
NK-D2	6	2
NK-D2	6	2
NK-D2	6	2
NK-D2	6	2
NK-D2	6	3
NK-D2	6	3
NK-D2	6	3
NK-D2	6	3
NK-D2	6	3
NK-D2	6	3
NK-D2	6	3
NK-D2	6	3
NK-D2	6	3
NK-D2	6	3
NK-D2	6	3
NK-D2	6	3
NK-D2	6	3
NK-D2	6	3
NK-D2	6	3
NK-D2	6	3
NK-D2	6	3
NK-D2	6	3
NK-D2	6	3
NK-D2	6	3
NK-D2	6	3
NK-D2	6	3
NK-D2	6	3
NK-D2	6	3
NK-D2	6	3
NK-D2	6	3
NK-D2	6	3
NK-D2	6	3
NK-D2	6	3
NK-D2	6	3
NK-D53	4	1
NK-D53	4	1
NK-D53	4	1
NK-D53	5	1
NK-D53	5	1
NK-D53	5	1
NK-D53	5	1
NK-D53	5	1
NK-D53	5	1
NK-D53	5	1
NK-D53	5	1
NK-D53	5	1
NK-D53	5	1
NK-D53	5	1
NK-D53	5	1
NK-D53	5	1
NK-D53	5	1
NK-D53	5	1
NK-D53	5	1
NK-D53	5	1
NK-D53	5	1
NK-D53	5	1
NK-D53	5	1
NK-D53	5	1
NK-D53	5	1
NK-D53	5	1
NK-D53	5	1
NK-D53	5	1
NK-D53	5	1
NK-D53	5	1
NK-D53	6	2
NK-D53	6	2
NK-D53	6	2
NK-D53	6	2
NK-D53	6	2
NK-D53	6	2
NK-D53	6	2
NK-D53	6	2
NK-D53	6	2
NK-D53	6	2
NK-D53	6	2
NK-D53	6	2
NK-D53	6	2
NK-D53	6	2
NK-D53	6	2
NK-D53	6	2
NK-D53	6	2
NK-D53	6	2
NK-D53	6	2
NK-D53	6	2
NK-D53	6	2
NK-D53	6	2
NK-D53	6	2
NK-D53	6	2
NK-D53	6	2
NK-D53	6	2
NK-D53	6	2
NK-D53	6	2
NK-D53	6	2
NK-D53	6	2
NK-D53	6	3
NK-D53	6	3
NK-D53	6	3
NK-D53	6	3
NK-D53	6	3
NK-D53	6	3
NK-D53	6	3
NK-D53	6	3
NK-D53	6	3
NK-D53	6	3
NK-D53	6	3
NK-D53	6	3
NK-D53	6	3
NK-D53	6	3
NK-D53	6	3
NK-D53	6	3
NK-D53	6	3
NK-D53	6	3
NK-D53	6	3
NK-D53	6	3
NK-D53	6	3
NK-D53	6	3
NK-D53	6	3
NK-D53	6	3
NK-D53	6	3
NK-D53	6	3
NK-D53	6	3
NK-D53	6	3
NK-D53	6	3
NK-D53	6	3
NK-E	1	1
NK-E	1	1
NK-E	0	1
NK-E	2	1
NK-E	2	1
NK-E	1	1
NK-E	1	1
NK-E	1	1
NK-E	1	1
NK-E	2	1
NK-E	2	1
NK-E	1	1
NK-E	0	1
NK-E	0	1
NK-E	1	1
NK-E	0	1
NK-E	1	1
NK-E	1	1
NK-E	2	1
NK-E	1	1
NK-E	1	1
NK-E	1	1
NK-E	1	1
NK-E	2	1
NK-E	2	1
NK-E	2	1
NK-E	2	1
NK-E	1	1
NK-E	1	1
NK-E	0	1
NK-E	4	2
NK-E	4	2
NK-E	4	2
NK-E	3	2
NK-E	3	2
NK-E	2	2
NK-E	4	2
NK-E	4	2
NK-E	4	2
NK-E	3	2
NK-E	3	2
NK-E	3	2
NK-E	3	2
NK-E	3	2
NK-E	3	2
NK-E	3	2
NK-E	3	2
NK-E	2	2
NK-E	3	2
NK-E	3	2
NK-E	2	2
NK-E	3	2
NK-E	3	2
NK-E	2	2
NK-E	4	2
NK-E	4	2
NK-E	2	2
NK-E	4	2
NK-E	4	2
NK-E	3	2
NK-E	3	3
NK-E	1	3
NK-E	0	3
NK-E	3	3
NK-E	2	3
NK-E	2	3
NK-E	4	3
NK-E	4	3
NK-E	4	3
NK-E	2	3
NK-E	2	3
NK-E	3	3
NK-E	4	3
NK-E	4	3
NK-E	2	3
NK-E	4	3
NK-E	3	3
NK-E	2	3
NK-E	3	3
NK-E	3	3
NK-E	2	3
NK-E	4	3
NK-E	4	3
NK-E	4	3
NK-E	3	3
NK-E	3	3
NK-E	3	3
NK-E	1	3
NK-E	3	3
NK-E	3	3
NK-E53	0	1
NK-E53	0	1
NK-E53	1	1
NK-E53	0	1
NK-E53	0	1
NK-E53	0	1
NK-E53	0	1
NK-E53	0	1
NK-E53	0	1
NK-E53	1	1
NK-E53	0	1
NK-E53	0	1
NK-E53	0	1
NK-E53	0	1
NK-E53	0	1
NK-E53	0	1
NK-E53	0	1
NK-E53	0	1
NK-E53	0	1
NK-E53	0	1
NK-E53	0	1
NK-E53	0	1
NK-E53	0	1
NK-E53	0	1
NK-E53	0	1
NK-E53	0	1
NK-E53	0	1
NK-E53	0	1
NK-E53	0	1
NK-E53	0	1
NK-E53	0	2
NK-E53	0	2
NK-E53	0	2
NK-E53	0	2
NK-E53	0	2
NK-E53	0	2
NK-E53	0	2
NK-E53	1	2
NK-E53	0	2
NK-E53	1	2
NK-E53	0	2
NK-E53	1	2
NK-E53	0	2
NK-E53	0	2
NK-E53	0	2
NK-E53	1	2
NK-E53	0	2
NK-E53	0	2
NK-E53	1	2
NK-E53	0	2
NK-E53	0	2
NK-E53	0	2
NK-E53	0	2
NK-E53	0	2
NK-E53	0	2
NK-E53	1	2
NK-E53	0	2
NK-E53	1	2
NK-E53	0	2
NK-E53	0	2
NK-E53	0	3
NK-E53	0	3
NK-E53	0	3
NK-E53	0	3
NK-E53	0	3
NK-E53	1	3
NK-E53	2	3
NK-E53	2	3
NK-E53	2	3
NK-E53	0	3
NK-E53	0	3
NK-E53	0	3
NK-E53	0	3
NK-E53	1	3
NK-E53	1	3
NK-E53	1	3
NK-E53	0	3
NK-E53	0	3
NK-E53	0	3
NK-E53	0	3
NK-E53	0	3
NK-E53	2	3
NK-E53	1	3
NK-E53	1	3
NK-E53	1	3
NK-E53	1	3
NK-E53	1	3
NK-E53	0	3
NK-E53	0	3
NK-E53	0	3
NK-A	1	1
NK-A	1	1
NK-A	0	1
NK-A	1	1
NK-A	1	1
NK-A	0	1
NK-A	1	1
NK-A	1	1
NK-A	0	1
NK-A	1	1
NK-A	0	1
NK-A	0	1
NK-A	0	1
NK-A	0	1
NK-A	0	1
NK-A	1	1
NK-A	1	1
NK-A	1	1
NK-A	1	1
NK-A	1	1
NK-A	0	1
NK-A	1	1
NK-A	1	1
NK-A	1	1
NK-A	2	1
NK-A	1	1
NK-A	1	1
NK-A	0	1
NK-A	0	1
NK-A	0	1
NK-A	1	2
NK-A	1	2
NK-A	1	2
NK-A	2	2
NK-A	2	2
NK-A	1	2
NK-A	2	2
NK-A	2	2
NK-A	2	2
NK-A	3	2
NK-A	3	2
NK-A	2	2
NK-A	2	2
NK-A	1	2
NK-A	0	2
NK-A	3	2
NK-A	2	2
NK-A	1	2
NK-A	2	2
NK-A	2	2
NK-A	1	2
NK-A	2	2
NK-A	2	2
NK-A	1	2
NK-A	2	2
NK-A	2	2
NK-A	1	2
NK-A	2	2
NK-A	2	2
NK-A	2	2
NK-A	2	3
NK-A	2	3
NK-A	0	3
NK-A	2	3
NK-A	2	3
NK-A	1	3
NK-A	1	3
NK-A	1	3
NK-A	0	3
NK-A	3	3
NK-A	3	3
NK-A	3	3
NK-A	1	3
NK-A	1	3
NK-A	1	3
NK-A	3	3
NK-A	3	3
NK-A	1	3
NK-A	2	3
NK-A	1	3
NK-A	0	3
NK-A	3	3
NK-A	3	3
NK-A	3	3
NK-A	2	3
NK-A	1	3
NK-A	1	3
NK-A	1	3
NK-A	1	3
NK-A	1	3
NK-A53	0	1
NK-A53	0	1
NK-A53	0	1
NK-A53	0	1
NK-A53	0	1
NK-A53	0	1
NK-A53	0	1
NK-A53	0	1
NK-A53	0	1
NK-A53	0	1
NK-A53	0	1
NK-A53	0	1
NK-A53	0	1
NK-A53	0	1
NK-A53	0	1
NK-A53	0	1
NK-A53	0	1
NK-A53	0	1
NK-A53	0	1
NK-A53	0	1
NK-A53	0	1
NK-A53	0	1
NK-A53	0	1
NK-A53	0	1
NK-A53	0	1
NK-A53	0	1
NK-A53	0	1
NK-A53	0	1
NK-A53	1	1
NK-A53	1	1
NK-A53	0	2
NK-A53	1	2
NK-A53	0	2
NK-A53	0	2
NK-A53	0	2
NK-A53	0	2
NK-A53	0	2
NK-A53	0	2
NK-A53	0	2
NK-A53	0	2
NK-A53	0	2
NK-A53	1	2
NK-A53	0	2
NK-A53	0	2
NK-A53	0	2
NK-A53	0	2
NK-A53	0	2
NK-A53	0	2
NK-A53	0	2
NK-A53	0	2
NK-A53	0	2
NK-A53	0	2
NK-A53	0	2
NK-A53	0	2
NK-A53	0	2
NK-A53	0	2
NK-A53	0	2
NK-A53	0	2
NK-A53	0	2
NK-A53	0	2
NK-A53	0	3
NK-A53	0	3
NK-A53	0	3
NK-A53	0	3
NK-A53	0	3
NK-A53	0	3
NK-A53	0	3
NK-A53	1	3
NK-A53	0	3
NK-A53	0	3
NK-A53	0	3
NK-A53	0	3
NK-A53	0	3
NK-A53	1	3
NK-A53	0	3
NK-A53	0	3
NK-A53	0	3
NK-A53	0	3
NK-A53	0	3
NK-A53	0	3
NK-A53	0	3
NK-A53	0	3
NK-A53	0	3
NK-A53	0	3
NK-A53	1	3
NK-A53	0	3
NK-A53	0	3
NK-A53	0	3
NK-A53	0	3
NK-A53	0	3
