# Supplementary material for: Protein engineering expands the effector recognition profile of a rice NLR immune receptor
Source: eLife journal article supplement (doi:10.7554/elife.47713), 2019-09-19
Supplement: figures [file elife-47713-figures-v2.pdf]

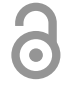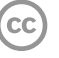

---

## Figures and figure supplements

Protein engineering expands the effector recognition profile of a rice NLR immune receptor

**Juan Carlos De la Concepcion *et al***

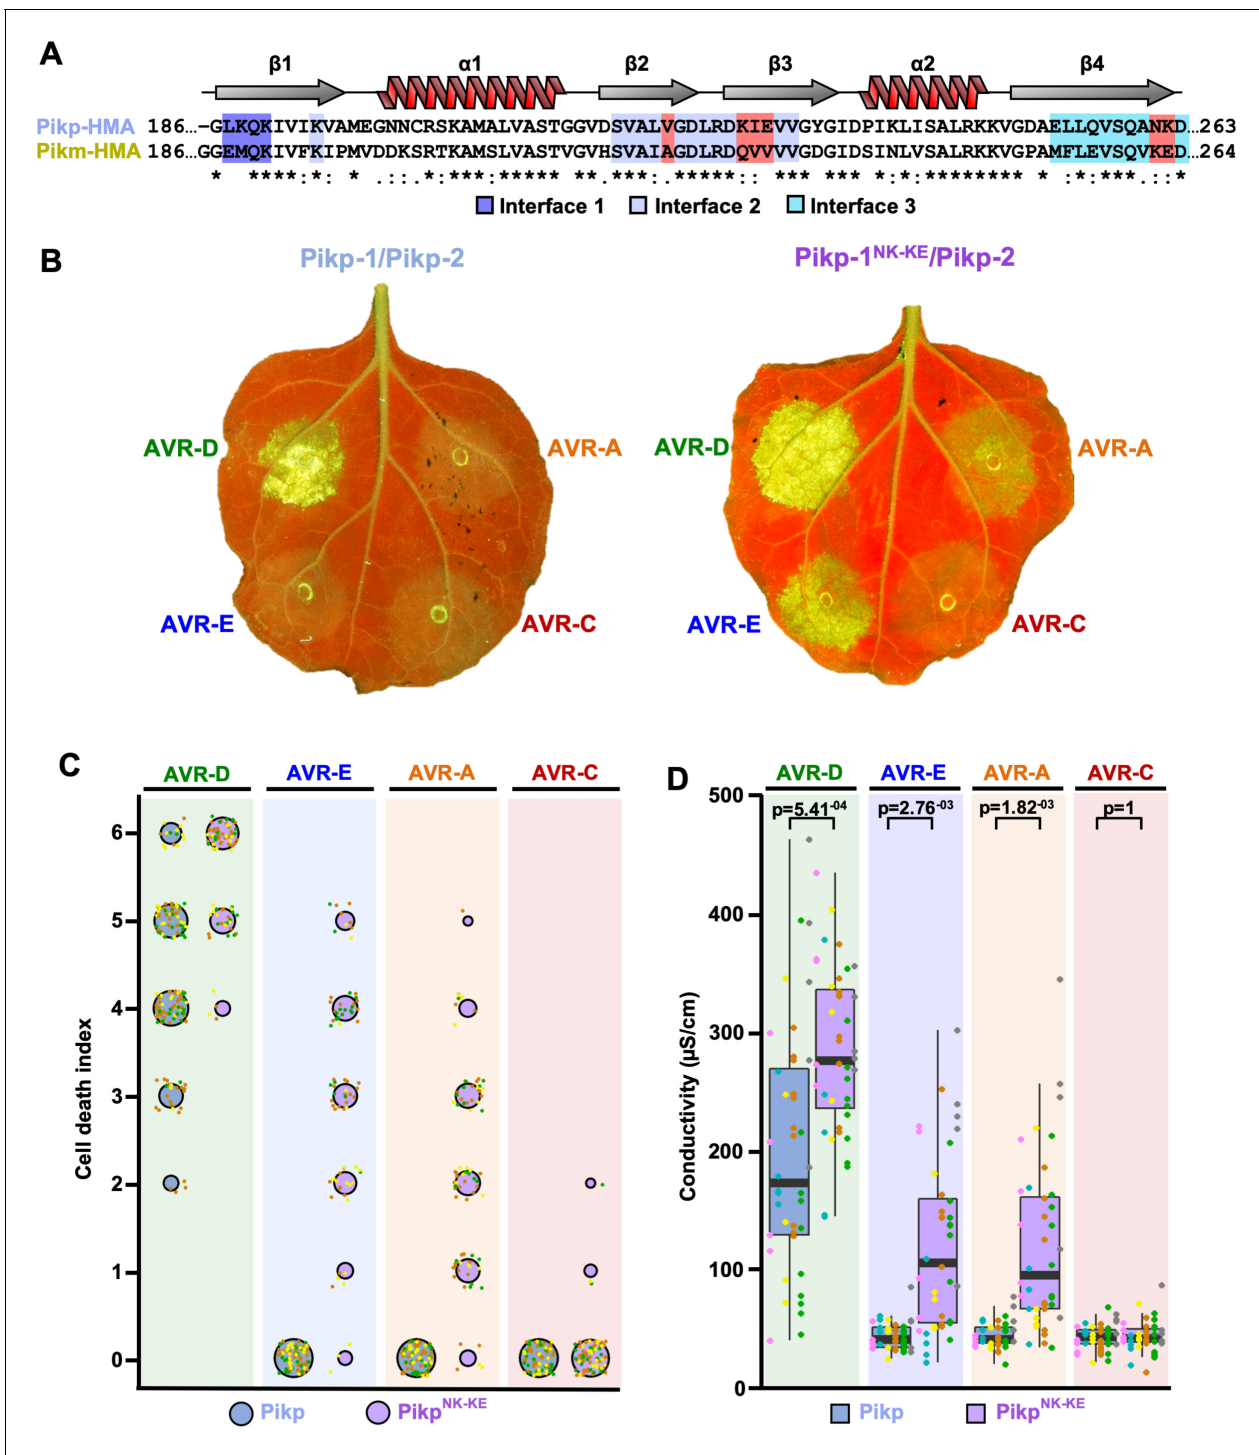

**Figure 1.** Structure-informed engineering expands Pikp-mediated effector recognition in *N. benthamiana*. (A) Sequence alignment of the Pikp-1 and Pikm-1 HMA domains. Secondary structure features of the HMA fold are shown above, and the residues that are located at binding interfaces are as colored. Key residues from interface 2 and interface 3 involved in this study are highlighted in red. (B) Representative leaf images showing Pikp- (left) or Pikp-1<sup>NK-KE</sup> (right)-mediated cell death in response to AVR-Pik variants as autofluorescence under UV light. (C) Autofluorescence intensity is scored as previously described (Maqbool et al., 2015; De la Concepcion et al., 2018). Cell death assay scores are represented as dot plots for Pikp and Pikp<sup>NK-KE</sup> (blue and purple, respectively). For each sample, all of the data points are represented as dots with a distinct color for each of the three biological replicates; these dots are plotted around the cell death score for visualization purposes. The size of the centre dot at each cell death value is directly proportional to the number of replicates in the sample with that score. The total number of repeats was 80. Data for Pikp have been previously shown (De la Concepcion et al., 2018), but was acquired at the same time as those for Pikp<sup>NK-KE</sup>. The estimation methods used to visualize differences in the Figure 1 continued on next page

Figure 1 continued

data sets are shown in **Figure 1—figure supplement 3. (D)** Conductivity measurements showing ion leakage as a quantitative measure of cell death. The centre line represents the median, the box limits are the upper and lower quartiles, the whiskers extend to the largest value within  $Q1 - 1.5 \times$  the interquartile range (IQR) and the smallest value within  $Q3 + 1.5 \times$  IQR. All the data points are shown as dots with distinct colors for each biological replicate. For each experiment, six biological replicates with 5 or 10 internal repeats were performed (total data points = 40). 'p' is the p-value obtained from statistical analysis and Tukey's HSD (honestly significant difference) test.

DOI: <https://doi.org/10.7554/eLife.47713.002>

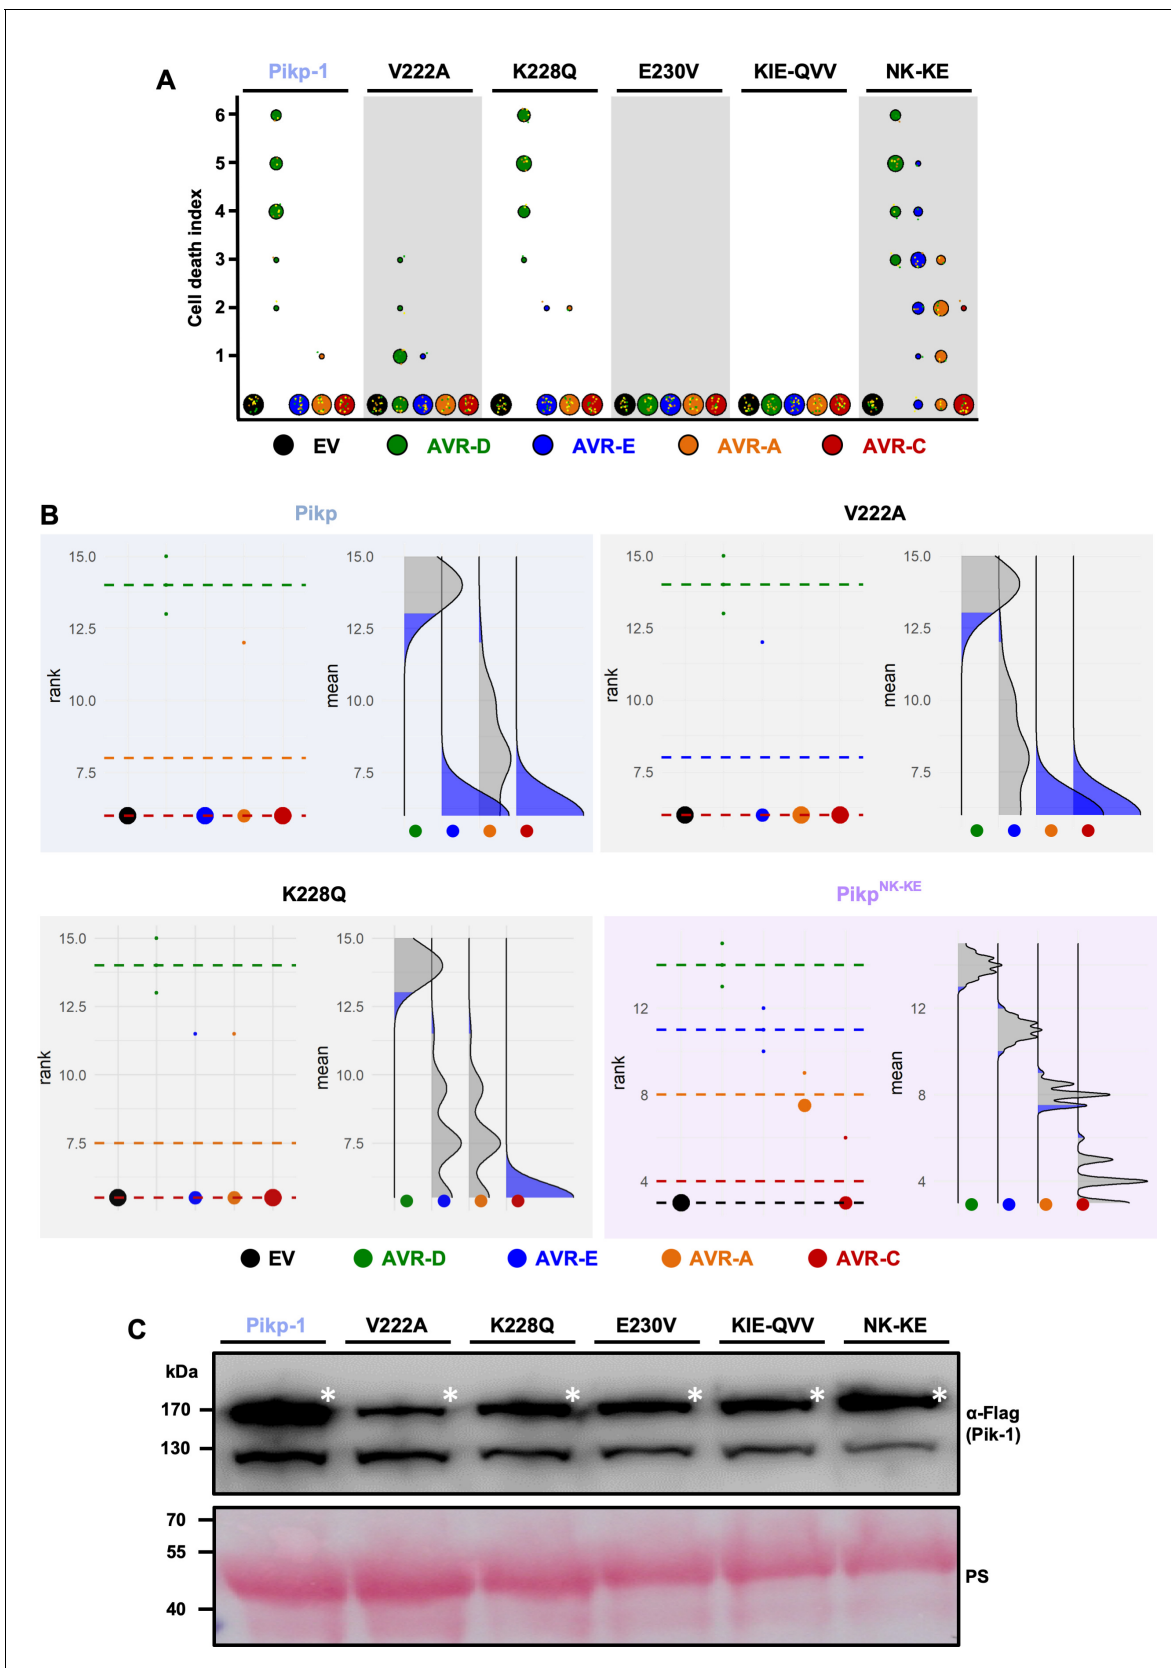

**Figure 1—figure supplement 1.** Mutations at interface 2 of the Pikp-1 HMA domain compromise the response to AVR-Pik effectors. (A) Cell-death assay scoring represented as dot plots for Pikp-1 mutants with mutations on HMA interface 2 and 3. For each sample, all of the data points are *Figure 1—figure supplement 1 continued on next page*

## Figure 1—figure supplement 1 continued

represented as dots with a distinct color for each of the three biological replicates; these dots are plotted around the cell death score for visualization purposes. The size of the central dot at each cell death value is proportional to the number of replicates of the sample with that score. The number of repeats was 18 for each mutant. (B) Statistical analysis by estimation methods of the cell death assay for Pik-1 mutants. The left panel represents the ranked data (dots) for each effector, and their corresponding mean (dotted line). The size of the dots is proportional to the number of observations with that value. The right panel shows the distribution of 1000 bootstrap sample rank means for each effector. The blue areas represent the 0.025 and 0.975 percentiles of the distribution. A sample (effector) score is considered significantly different from the control (EV) when the control rank mean (dotted line on the left) falls beyond the blue regions of the effector mean distribution. When the rank means for different effectors have the same value, only one dotted line is visible (EV, AVR-E and AVR-C for Pikp and K228Q, and EV, AVR-A and AVR-C for V222A). (C) Western blot analysis confirming similar levels of Pik-1 protein accumulation in *N. benthamiana*. The asterisks mark the Pik-1 band, PS = Ponceau Stain.

DOI: <https://doi.org/10.7554/eLife.47713.003>

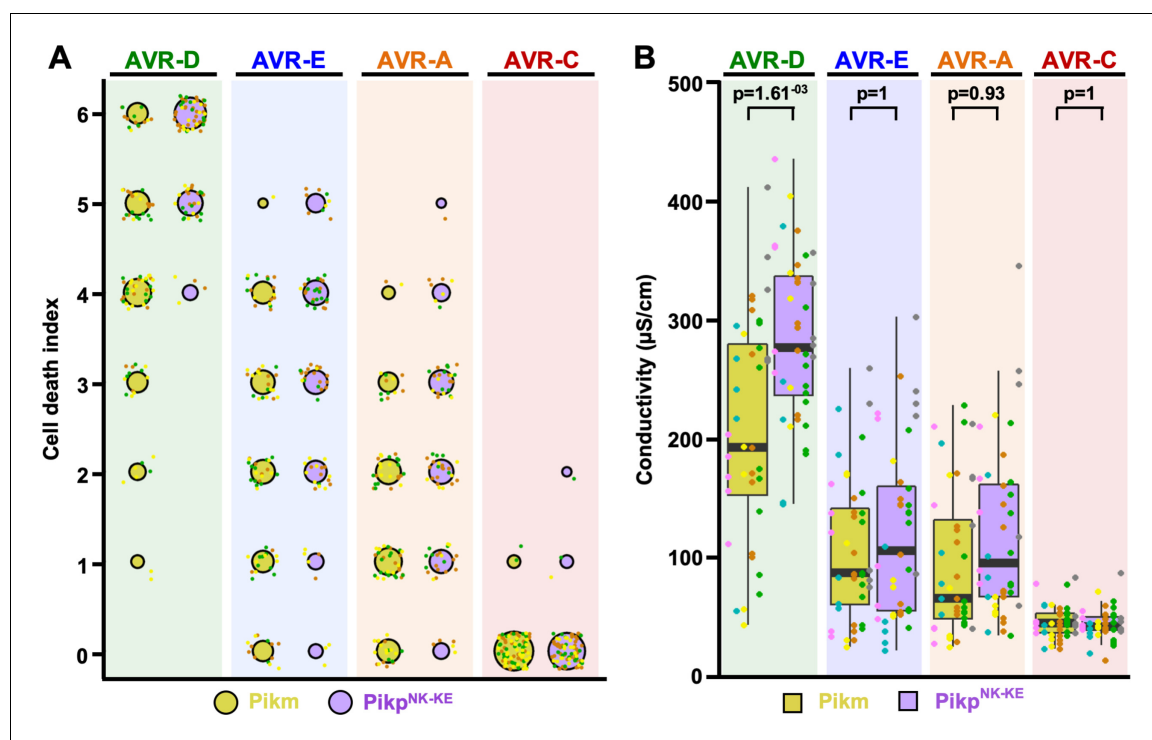

**Figure 1—figure supplement 2.** Response of  $\text{Pikp}^{\text{NK-KE}}$  to AVR-Pik effectors compared to that of  $\text{Pikm}$ . (A) Cell-death autofluorescence scoring represented as dot plots for  $\text{Pikm}$  and  $\text{Pikp}^{\text{NK-KE}}$  (yellow and purple, respectively). The numbers of repeats were 80 and 90 for  $\text{Pikp}^{\text{NK-KE}}$  and  $\text{Pikm}$ , respectively. For each sample, all of the data points are represented as dots with a distinct color for each of the three biological replicates; these dots are plotted around the cell-death score for visualization purposes. The size of the central dot at each cell death value is proportional to the number of replicates of the sample with that score. Data for  $\text{Pikm}$  have been previously shown (De la Concepcion et al., 2018), but were acquired at the same time as those for  $\text{Pikp}^{\text{NK-KE}}$ . The estimation methods used to visualize differences in the data sets are shown in Figure 1—figure supplement 4. (B) Conductivity measurements showing ion leakage as a quantitative measure of cell death. The centre line represents the median, the box limits are the upper and lower quartiles, the whiskers extend to the largest value within  $Q1 - 1.5 \times \text{IQR}$  and the smallest value within  $Q3 + 1.5 \times \text{IQR}$ . All of the data points are shown as dots with distinct colors for each biological replicate. For each experiment, six biological replicates with 5 or 10 internal repeats were performed (total data points = 40). 'p' is the p-value obtained from statistical analysis and Tukey's HSD.

DOI: <https://doi.org/10.7554/eLife.47713.005>

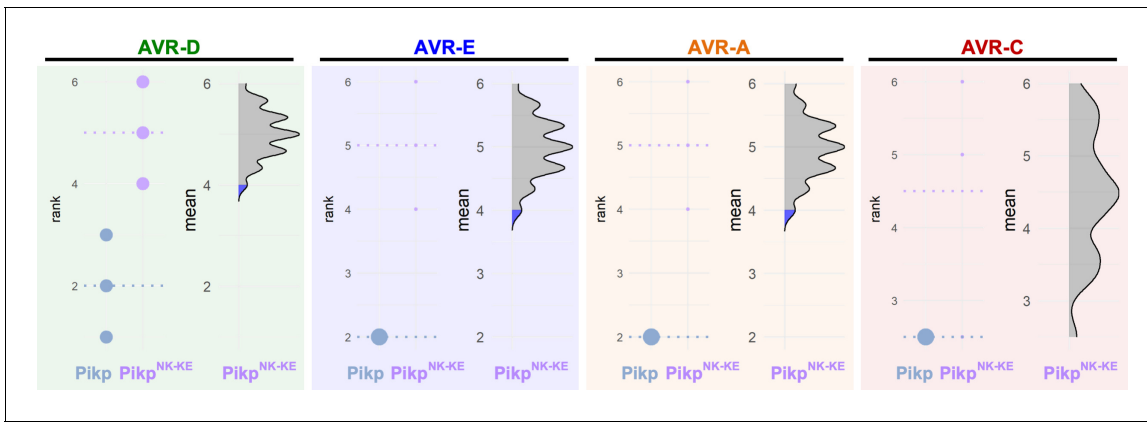

**Figure 1—figure supplement 3.** Estimation graphics for cell death, Pikp vs Pikp<sup>NK-KE</sup>. Statistical analysis by estimation methods of the cell-death assay for Pikp and Pikp<sup>NK-KE</sup>. For each effector, the panel on the left represents the ranked data (dots) for each NLR, and their corresponding mean (dotted line). The size of the dots is proportional to the number of observations with that specific value. The panel on the right shows the distribution of 1000 bootstrap sample rank means for Pikp<sup>NK-KE</sup>. The blue areas represent the 0.025 and 0.975 percentiles of the distribution. The response of Pikp and Pikp<sup>NK-KE</sup> are considered significantly different if the Pikp rank mean (dotted line, left panel) falls beyond the blue regions of the Pikp<sup>NK-KE</sup> mean distribution.

DOI: <https://doi.org/10.7554/eLife.47713.007>

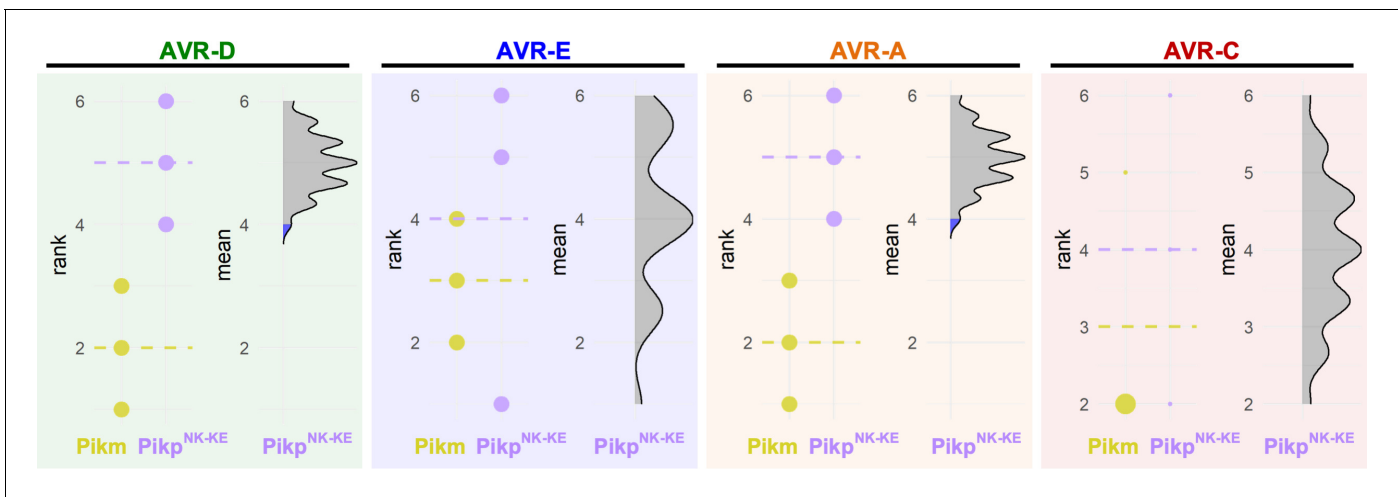

**Figure 1—figure supplement 4.** Estimation graphics for cell death,  $\text{Pikm}$  vs  $\text{Pikp}^{\text{NK-KE}}$ . Statistical analysis by estimation methods of the cell-death assay for  $\text{Pikm}$  and  $\text{Pikp}^{\text{NK-KE}}$ . For each effector, the panel on the left represents the ranked data (dots) for each NLR, and their corresponding mean (dotted line). The size of the dots is proportional to the number of observations with that specific value. The panel on the right shows the distribution of 1000 bootstrap sample rank means for  $\text{Pikp}^{\text{NK-KE}}$ . The blue areas represent the 0.025 and 0.975 percentiles of the distribution. The responses of  $\text{Pikm}$  and  $\text{Pikp}^{\text{NK-KE}}$  are considered significantly different if the  $\text{Pikp}^{\text{NK-KE}}$  mean distribution.

DOI: <https://doi.org/10.7554/eLife.47713.008>



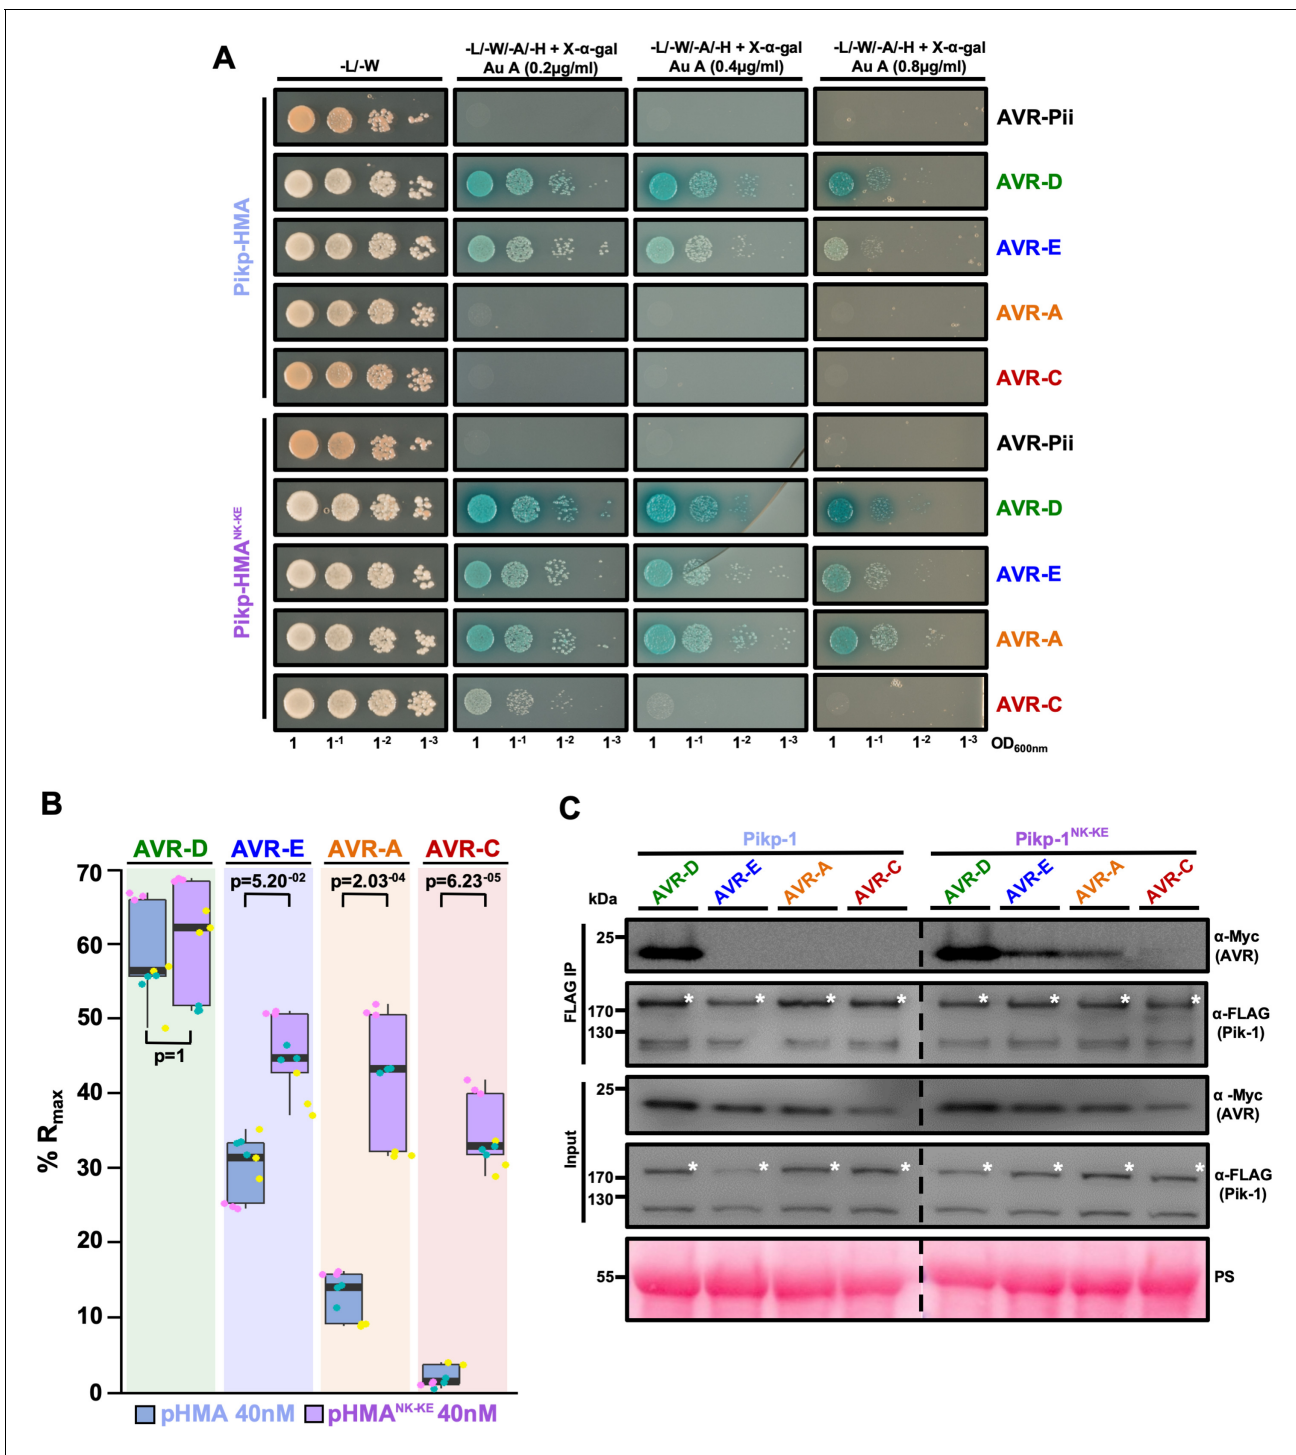

**Figure 2.** Pikp<sup>NK-KE</sup> shows increased binding to effector variants in vivo and in vitro when compared to wild type Pikp. (A) Yeast two-hybrid assay of Pikp-HMA and Pikp-HMA<sup>NK-KE</sup> with AVR-Pik alleles. Control plates for yeast growth are on the left, with quadruple dropout media supplemented with X-α-gal and increasing concentrations of Aureobasidin A on the right for each combination of HMA/AVR-Pik. The unrelated *M. oryzae* effector AVR-Pii was used as a negative control. Growth and the development of blue coloration in the selection plate are both indicative of protein-protein interaction. HMA domains were fused to the GAL4 DNA binding domain, and AVR-Pik alleles to the GAL4 activator domain. Each experiment was repeated a minimum of three times, with similar results. (B) Box plots showing %R<sub>max</sub>, as measured by surface plasmon resonance, for Pikp-HMA and Pikp-HMA<sup>NK-KE</sup> with the AVR-Pik effectors alleles at an HMA concentration of 40 nM. Pikp-HMA and Pikp-HMA<sup>NK-KE</sup> are represented by blue and purple boxes, respectively. The centre line within each box represents the median, the box limits are the upper and lower quartiles, the whiskers extend to the largest value within Q1 – 1.5 × the interquartile range (IQR) and the smallest value within Q3 + 1.5 × IQR. All of the data points are represented as dots with Figure 2 continued on next page

## Figure 2 continued

distinct colors for each biological replicate. For each experiment, three biological replicates with three internal repeats were performed. 'p' is the p-value obtained from statistical analysis and Tukey's HSD. For results of experiments with 4 nM and 100 nM HMA protein concentration, see **Figure 2—figure supplement 2**. (C) Co-immunoprecipitation of full length Pikp-1 and Pikp-1<sup>NK-KE</sup> with AVR-Pik variants. N-terminally 4xMyc tagged AVR-Pik effectors were transiently co-expressed with Pikp-1:6xHis3xFLAG (left) or with Pikp-1<sup>NK-KE</sup>:6xHis3xFLAG (right) in *N. benthamiana*. Immunoprecipitates (IPs) obtained with anti-FLAG antiserum, and total protein extracts, were probed with appropriate antisera. The dashed line indicates a crop site on the same blot used to compose the figure. Each experiment was repeated at least three times, with similar results. The asterisks mark the Pik-1 band. PS = Ponceau Stain.

DOI: <https://doi.org/10.7554/eLife.47713.011>

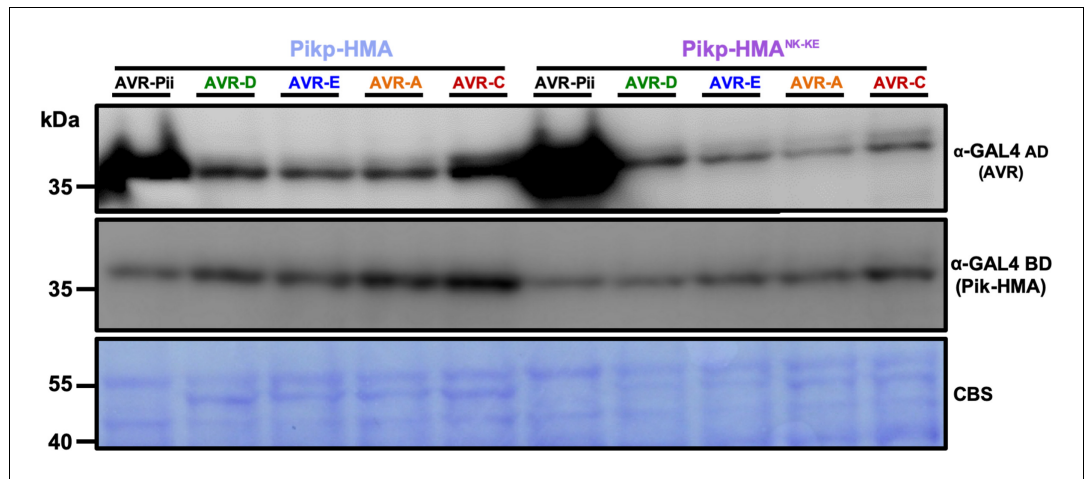

**Figure 2—figure supplement 1.** Western blot confirming the accumulation of proteins in yeast. Yeast lysate was probed for the expression of HMA domains with anti-GAL4 DNA-binding domain (BD) or AVR-Pik/AVR-Pii effectors anti-GAL4 activation domain (AD). Total extract was colored with Ponceau Stain (PS). The experiment was repeated a minimum of 3 times, with similar results. PS = Ponceau Stain.

DOI: <https://doi.org/10.7554/eLife.47713.012>

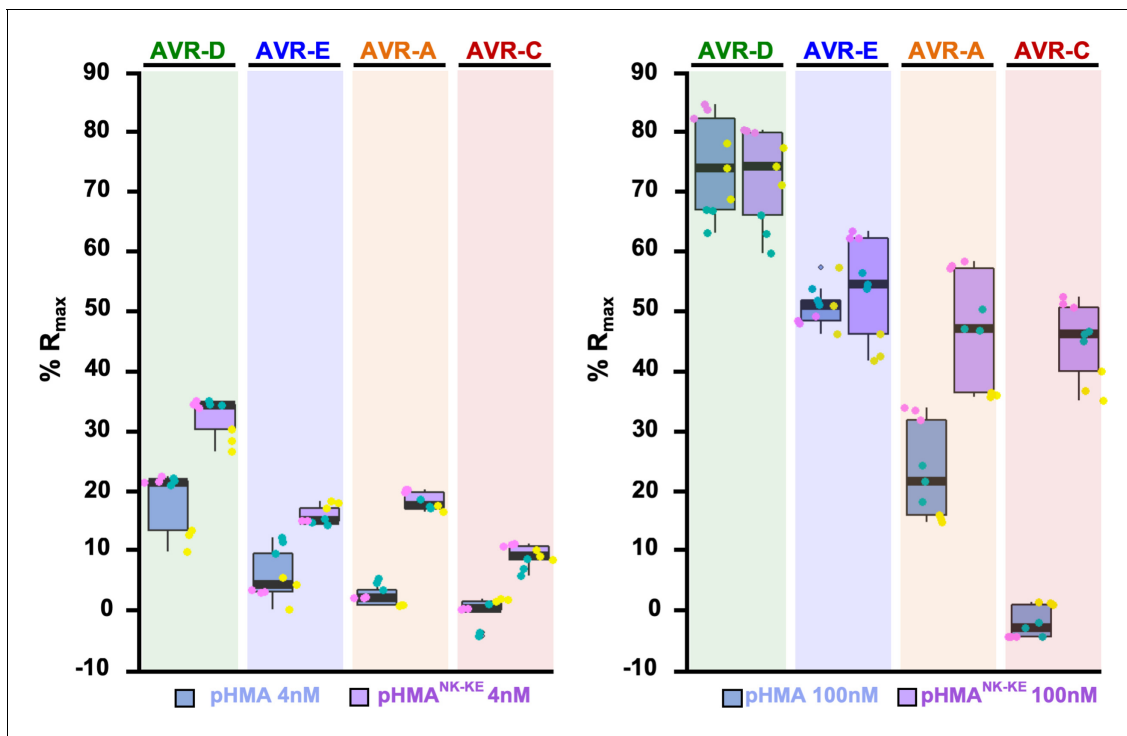

**Figure 2—figure supplement 2.** Binding of the Pkp-HMA<sup>NK-KE</sup> domain to the AVR-Pik effectors is consistently greater than that of Pkp-HMA. %R<sub>max</sub> of Pkp-HMA and Pkp-HMA<sup>NK-KE</sup> with each AVR-Pik effectors allele with HMA concentrations of 4 nM (left) and 100 nM (right). The centre line within each box represents the median, the box limits are the upper and lower quartiles, the whiskers extend to the largest value within Q1 – 1.5 × the interquartile range (IQR) and the smallest value within Q3 + 1.5 × IQR. All of the data points are represented as dots with distinct colors for each biological replicate. For each experiment, three biological replicates with three internal replicates were performed.

DOI: <https://doi.org/10.7554/eLife.47713.013>

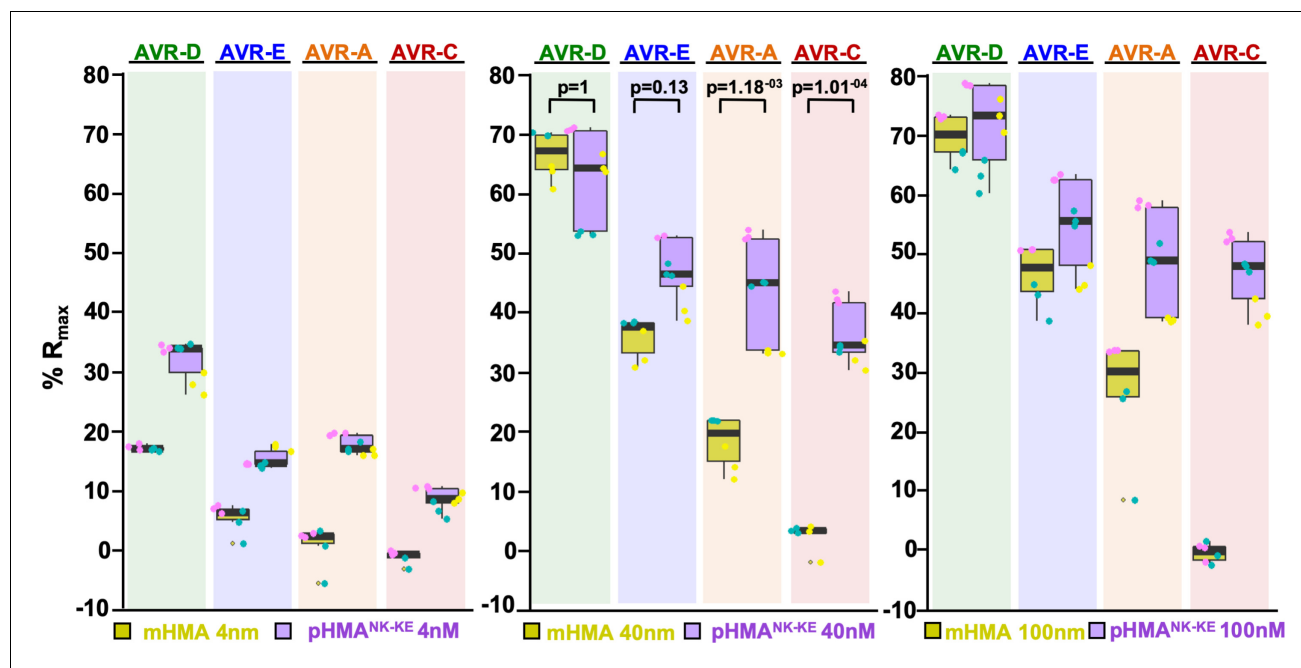

**Figure 2—figure supplement 3.** Binding of the P1kp-HMA<sup>NK-KE</sup> domain to the AVR-Pik effectors is consistently greater than that of the P1km-HMA domain. Surface plasmon resonance %R<sub>max</sub> values for P1km-HMA and P1kp-HMA<sup>NK-KE</sup> with the AVR-Pik effector alleles. The P1km-HMA and P1kp-HMA<sup>NK-KE</sup> results are represented by yellow and purple boxes, respectively. The centre line within each box represents the median, the box limits are the upper and lower quartiles, the whiskers extend to the largest value within Q1 - 1.5 × the interquartile range (IQR) and the smallest value within Q3 + 1.5 × IQR. All the data points are represented as dots with distinct colors for each biological replicate. For each experiment, we performed at least two biological replicates with three internal repeats. Results obtained using HMA protein concentrations of 4, 40 and 100 nM are plotted in the left, middle and right panels, respectively. ('p' is the p-value obtained from statistical analysis and Tukey's HSD.)

DOI: <https://doi.org/10.7554/eLife.47713.016>

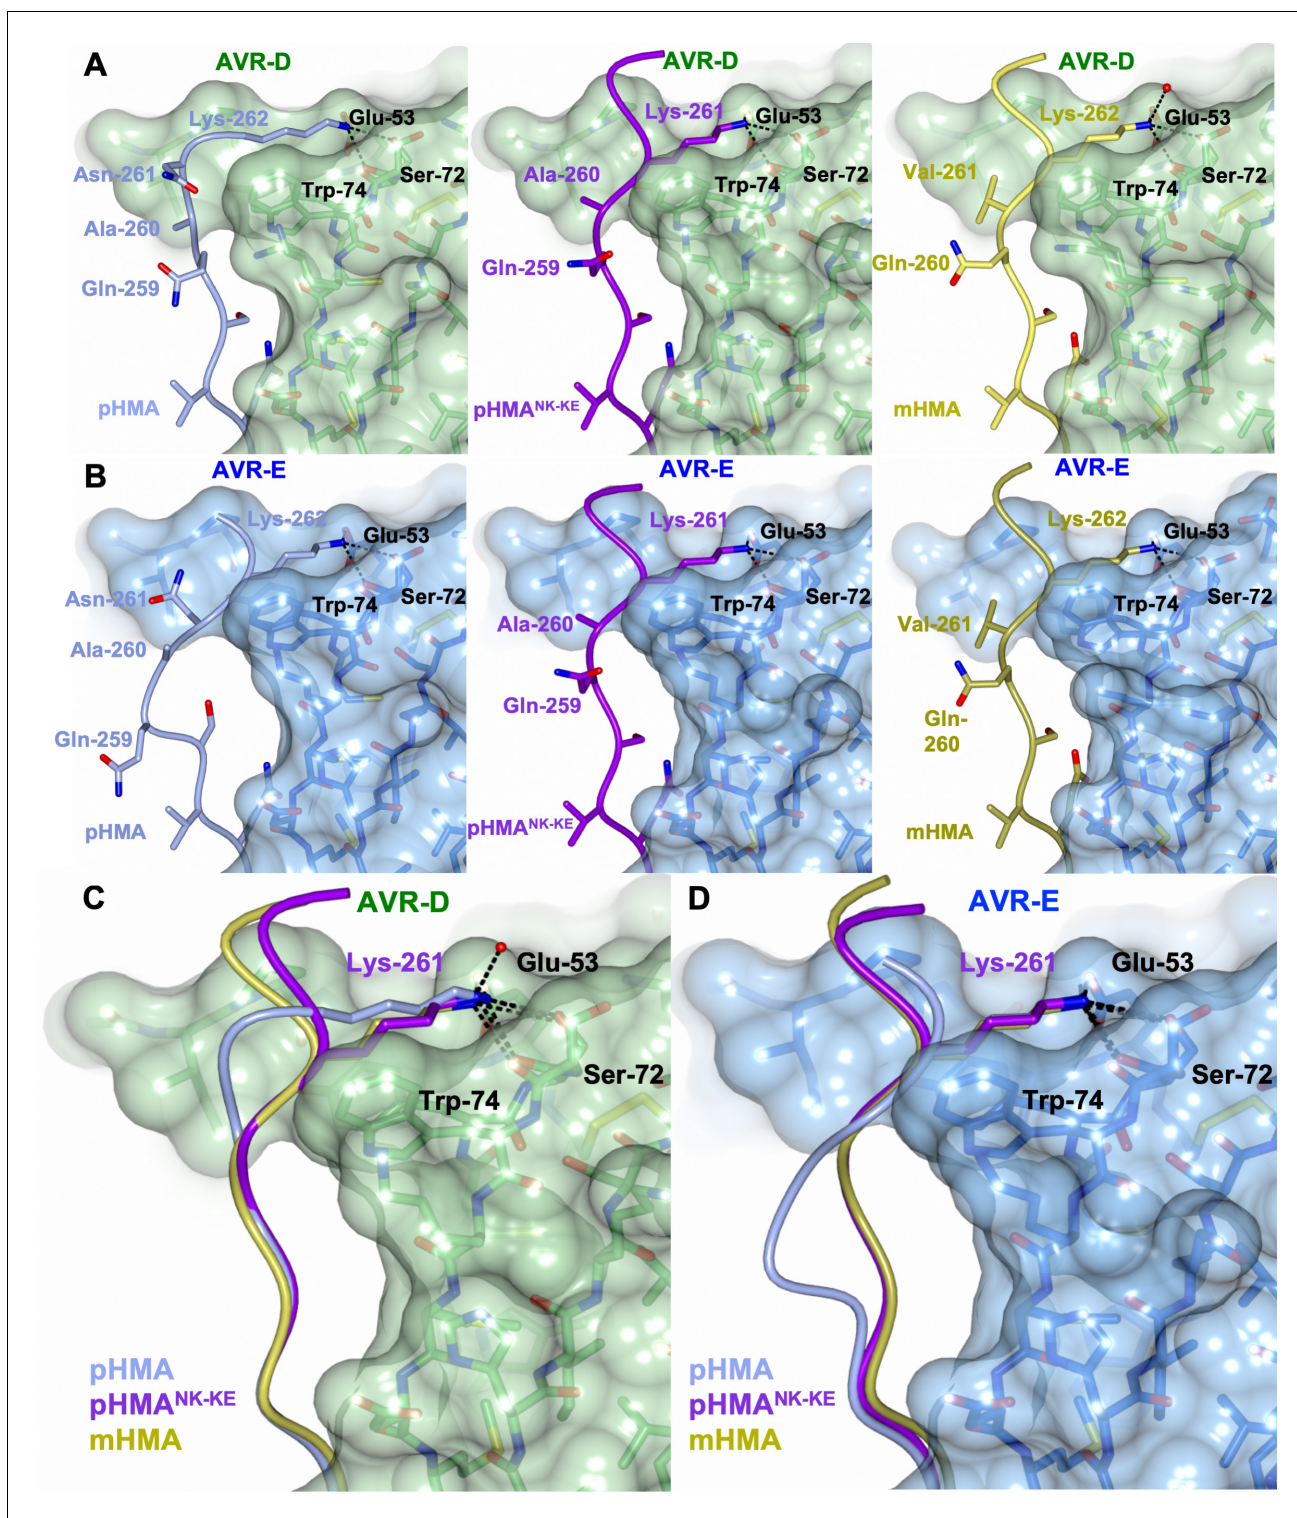

**Figure 3.** The  $\text{Pikp}^{\text{NK-KE}}$ -HMA mutant adopts a  $\text{Pikm}$ -like conformation at the effector-binding interface. Schematic view of the different conformations adopted by  $\text{Pikp}$ -HMA,  $\text{Pikp}$ -HMA<sup>NK-KE</sup> and  $\text{Pikm}$ -HMA at interface 3 when in complex with AVR-PikD or AVR-PikE. In each panel, the effector is shown as sticks with the molecular surface also shown and colored as labeled.  $\text{Pik}$ -HMA residues are colored as labeled and shown in the  $\text{C}\alpha$ -worm with side-chain representation. (A) Schematic of  $\text{Pikp}$ -HMA (left),  $\text{Pikp}$ -HMA<sup>NK-KE</sup> (middle) and  $\text{Pikm}$ -HMA (right) bound to AVR-PikD. Important residues in the HMA–effector interaction are labeled as shown. (B) Schematic of HMA residues as for panel (A), but bound to AVR-PikE. (C) Superposition showing  $\text{Pikp}$ -HMA,  $\text{Pikp}$ -HMA<sup>NK-KE</sup> and  $\text{Pikm}$ -HMA chains (colored in blue, purple and yellow, respectively) bound to AVR-PikD. For clarity, only the Lys-261/262 side chain is shown. (D) Superposition as described before, but bound to AVR-PikE.

DOI: <https://doi.org/10.7554/eLife.47713.020>

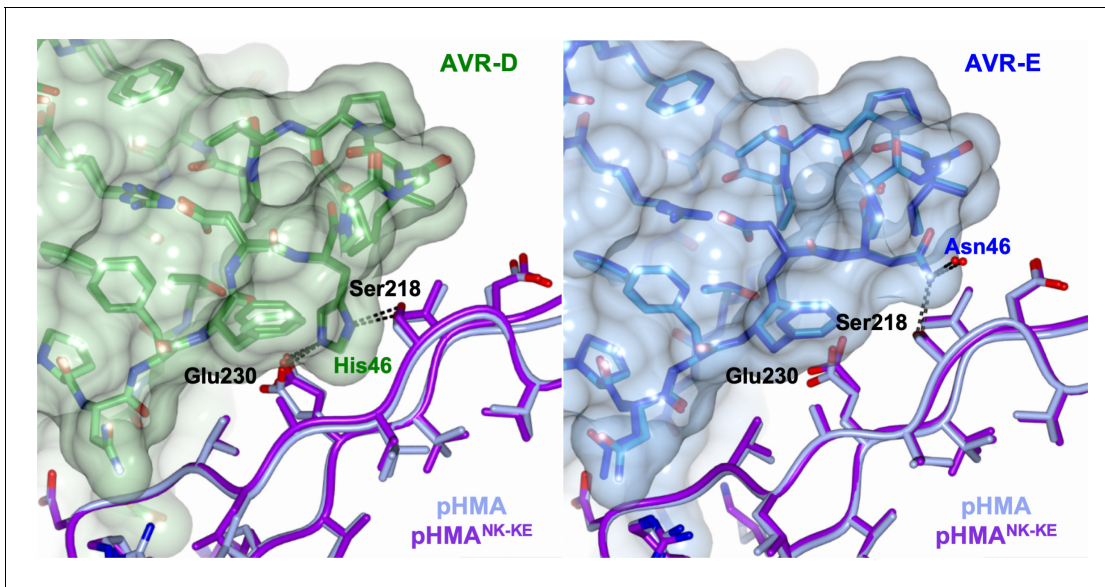

**Figure 3—figure supplement 1.** Interface 2 is essentially identical in the complexes comprising Pknp-HMA and Pknp-HMA<sup>NK-KE</sup> bound to AVR-PikD or AVR-PikE. Schematic view of the conformations adopted by Pknp-HMA and Pknp-HMA<sup>NK-KE</sup> at interface 2 in complex with AVR-PikD or AVR-PikE. In each panel, the effector is shown in sticks, with the molecular surface also shown and colored as labeled. Pknp-HMA residues are colored as labeled and shown in the C $\alpha$ -worm with side-chain representation. The structures were overlaid on the effectors. (A) Pknp-HMA and Pknp-HMA<sup>NK-KE</sup> (colored in blue and purple, respectively) bound to AVR-PikD (light and dark green). (B) Pknp-HMA and Pknp-HMA<sup>NK-KE</sup> bound to AVR-PikE (light and dark blue).

DOI: <https://doi.org/10.7554/eLife.47713.021>

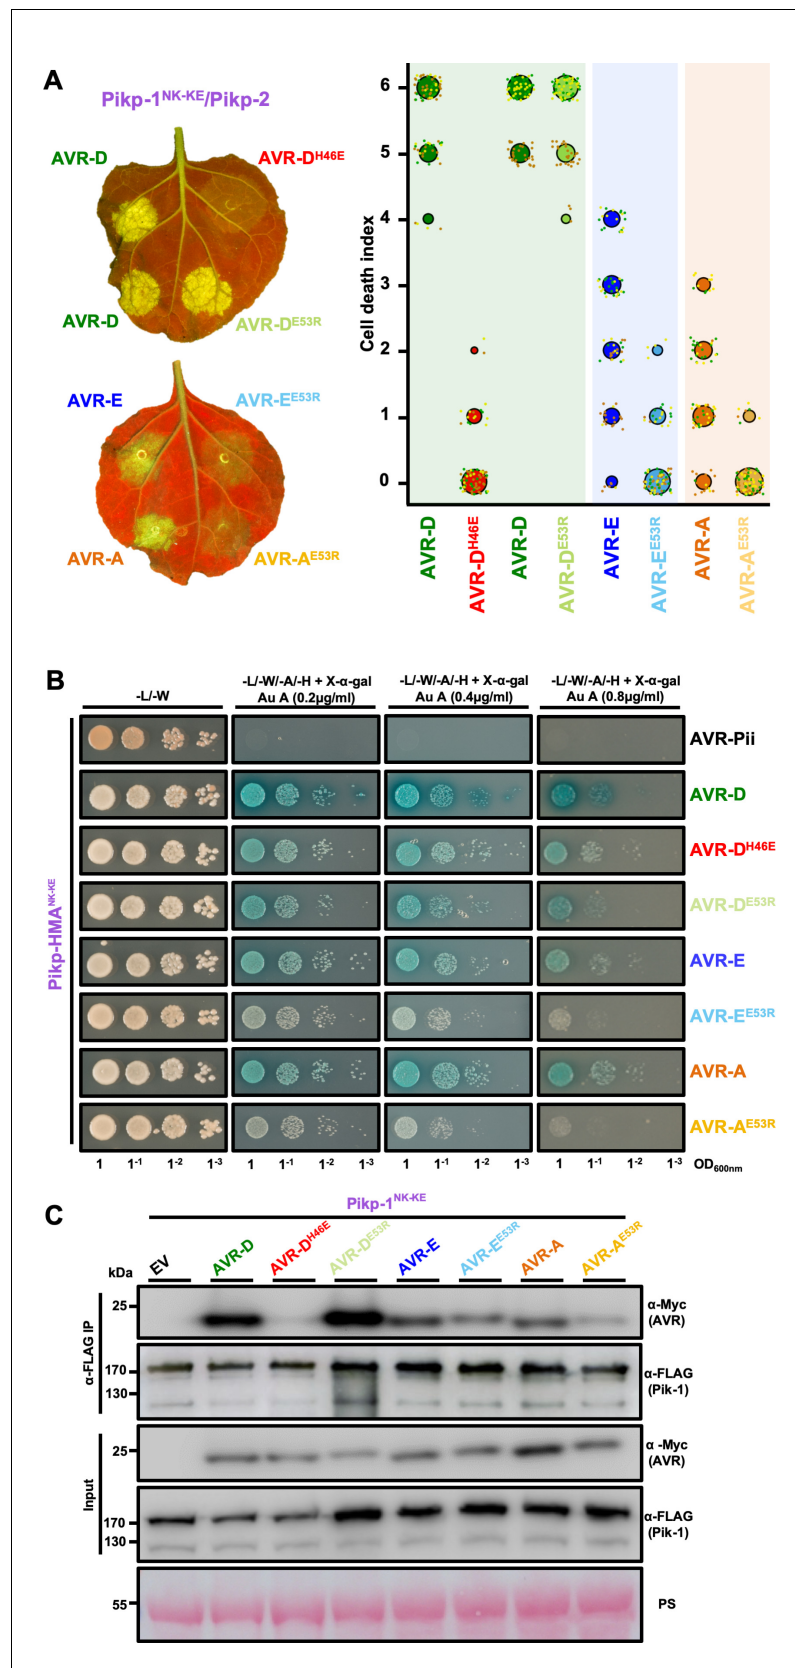

**Figure 4.** Mutation of AVR-Pik effectors at the engineered binding interface compromises binding and response. (A) (Left) A representative leaf image showing *Pikp-1<sup>NK-KE</sup>*-mediated cell death induced by AVR-Pik variants and Figure 4 continued on next page



## Figure 4 continued

mutants as autofluorescence under UV light (the AVR-PikD<sup>H46E</sup> mutant is located at interface 2, whereas the AVR-PikD<sup>E53R</sup>, AVR-PikE<sup>E53R</sup>, and AVR-PikA<sup>E53R</sup> mutants are located at interface 3). Autofluorescence intensity is scored as in **Figure 1**. (Right) Pikp<sup>NK-KE</sup> cell-death assay quantification in the form of dot plots. For each sample, the data points are represented as dots with a distinct color for each of the three biological replicates; these dots are plotted around the cell death score for visualization purposes. The size of the central dot at each cell death value is proportional to the number of replicates of the sample with that score. The number of repeats was 90. (B) Yeast-two-hybrid assay of Pikp-HMA<sup>NK-KE</sup> with AVR-Pik variants and mutants. Control plate for yeast growth is on the left with quadruple dropout media supplemented with X- $\alpha$ -gal and increasing concentrations of Aureobasidin A on the right for each combination of HMA/AVR-Pik. The unrelated *M. oryzae* effector AVR-Pii was used as a negative control. Growth and the development of blue coloration in the selection plate are both indicative of protein–protein interaction. HMA domains were fused to the GAL4 DNA binding domain, and AVR-Pik alleles to the GAL4 activator domain. Each experiment was repeated a minimum of three times, with similar results. (C) Co-immunoprecipitation of full-length Pikp-1<sup>NK-KE</sup> with AVR-Pik variants and mutants. N-terminally 4xMyc tagged AVR-Pik effectors were transiently co-expressed with Pikp-1<sup>NK-KE</sup>:6xHis3xFLAG in *N. benthamiana* leaves. Immunoprecipitates (IPs) obtained with anti-FLAG antiserum, and total protein extracts, were probed with appropriate antisera. Each experiment was repeated at least three times, with similar results. The asterisks mark the Pik-1 band. PS = Ponceau Stain.

DOI: <https://doi.org/10.7554/eLife.47713.022>

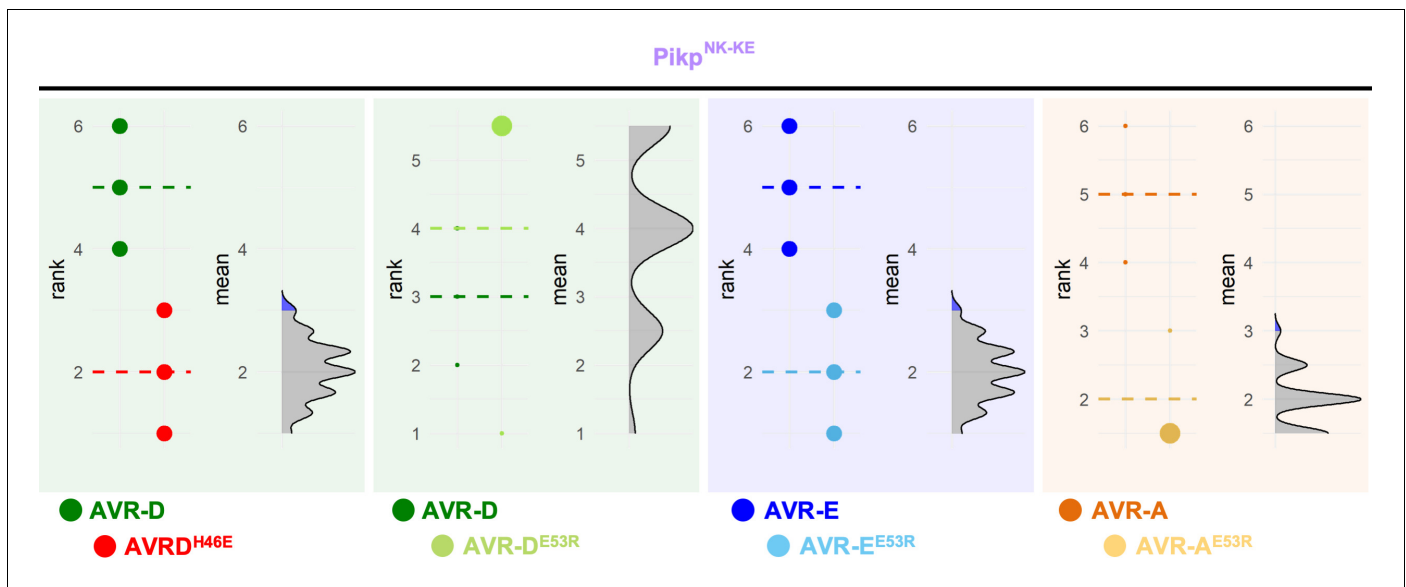

**Figure 4—figure supplement 1.** Estimation graphics for cell death induced by  $\text{Pikp}^{\text{NK-KE}}$  with AVR-Pik variants and mutants. Statistical analysis by estimation methods of the cell-death assay for  $\text{Pikp}^{\text{NK-KE}}$  with AVR-Pik variants and mutants. The response to each mutant is compared with the response to the corresponding wild-type variant. For each couple, the panel on the left represents the ranked data (dots) for each effector, and their corresponding mean (dotted line). The size of the dots is proportional to the number of observations with that specific value. The panel on the right shows the distribution of 1000 bootstrap sample rank means for the mutant. The blue areas represent the 0.025 and 0.975 percentiles of the distribution. The responses to  $\text{Pikp}^{\text{NK-KE}}$  for the wild-type effectors and their corresponding effector mutants are considered to be significantly different if the wild-type rank mean (dotted line, left panel) falls beyond the blue regions of the mutant mean distribution.

DOI: <https://doi.org/10.7554/eLife.47713.023>

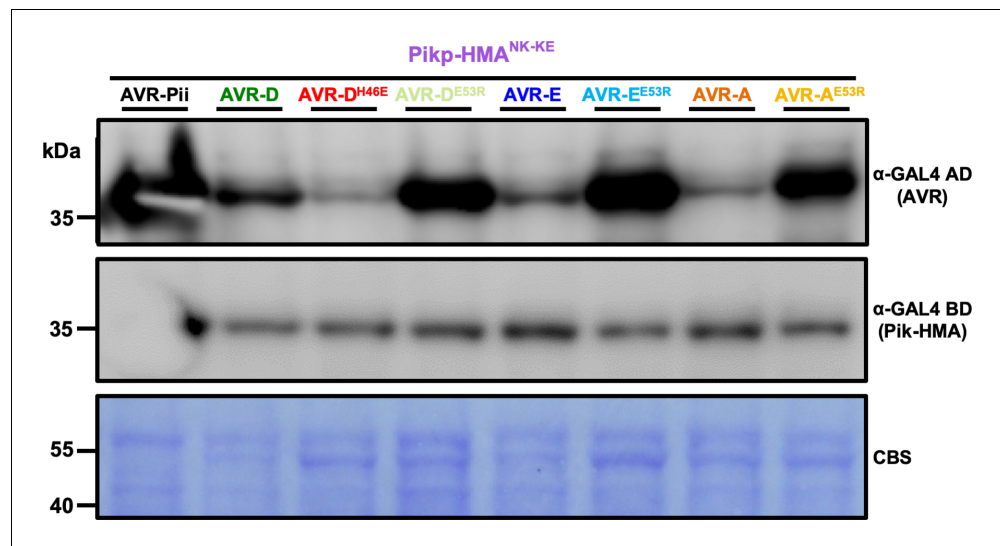

**Figure 4—figure supplement 2.** Western blot analysis confirming the accumulation of proteins in yeast. Yeast lysate was probed for the expression of the HMA domain using the anti-GAL4 DNA binding domain (BD) or the AVR-Pik/AVR-Pii effectors anti-GAL4 activation domain (AD). The experiment was repeated a minimum of three times, with similar results. CBS = Coomassie Blue Stain. In each case, the effector mutants consistently accumulate to higher levels than the wild-type proteins, but result in weaker readouts of protein–protein interaction in the Y2H assay.

DOI: <https://doi.org/10.7554/eLife.47713.024>
